# Supplementary material for: Cloning of the wheat Yr15 resistance gene sheds light on the plant tandem kinase-pseudokinase family
Source: PubMed Central journal article supplement (PMC6170490; doi:10.1038/s41467-018-06138-9), 2018-10-03
Supplement: 41467_2018_6138_MOESM1_ESM.pdf [file 41467_2018_6138_MOESM1_ESM.pdf]

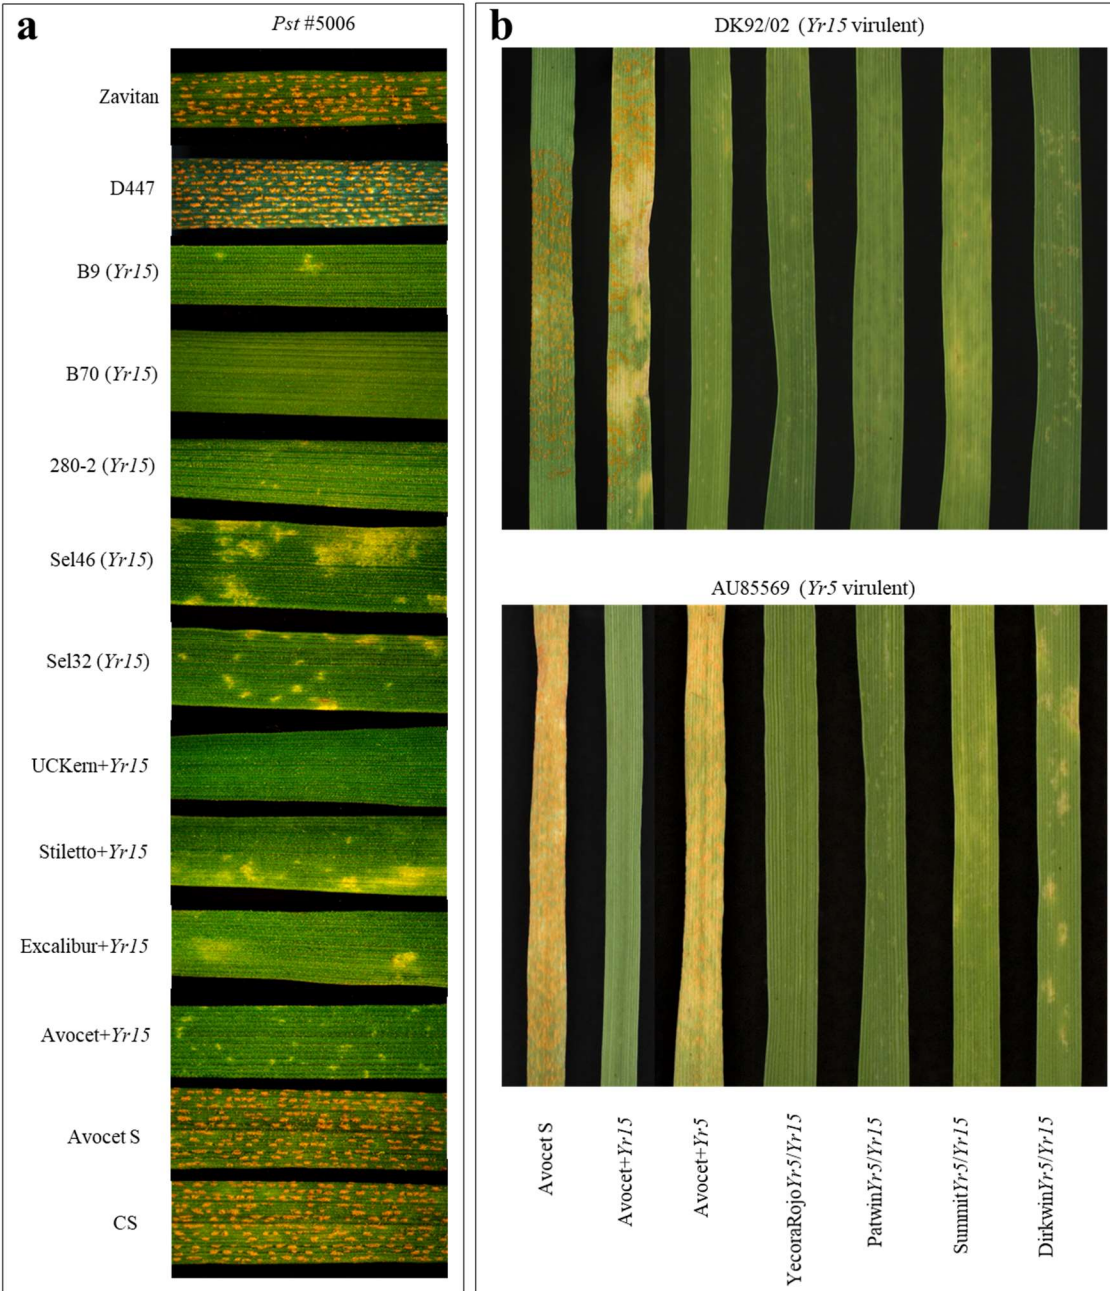

**Supplementary Figure 1. a**, Phenotyping of *Yr15* introgression lines<sup>1</sup> at 15 dpi, inoculated with *Pst* isolate #5006. All acceptor lines were previously shown to be susceptible to *Pst* isolate #5006<sup>1</sup>. Zavitan, D447, Avocet S and CS served as susceptible controls. **b**, Phenotypic responses of *Yr15*, *Yr5* and *Yr15/Yr5* introgression lines to inoculation with *Pst* isolates DK92/02 and AU85569 at 19 dpi. *Yr5* and *Yr15* were introgressed via marker-assisted selection (six backcrosses) respectively from donor lines Avocet+*Yr5* (*Yr5/6*\*Avocet) and Sunset+*Yr15* (*Yr15/6*\*Sunset) into the following recurrent parents (pedigrees in parentheses): YecoraRojo (Ciano 67//Sonora 64/Klein Rendidor/3/II-8156 = II23584), Patwin (Madsen/2\*Express), Summit (Express//Tadorna/PB775), Dirkwin (Twin/Triple Dirk).

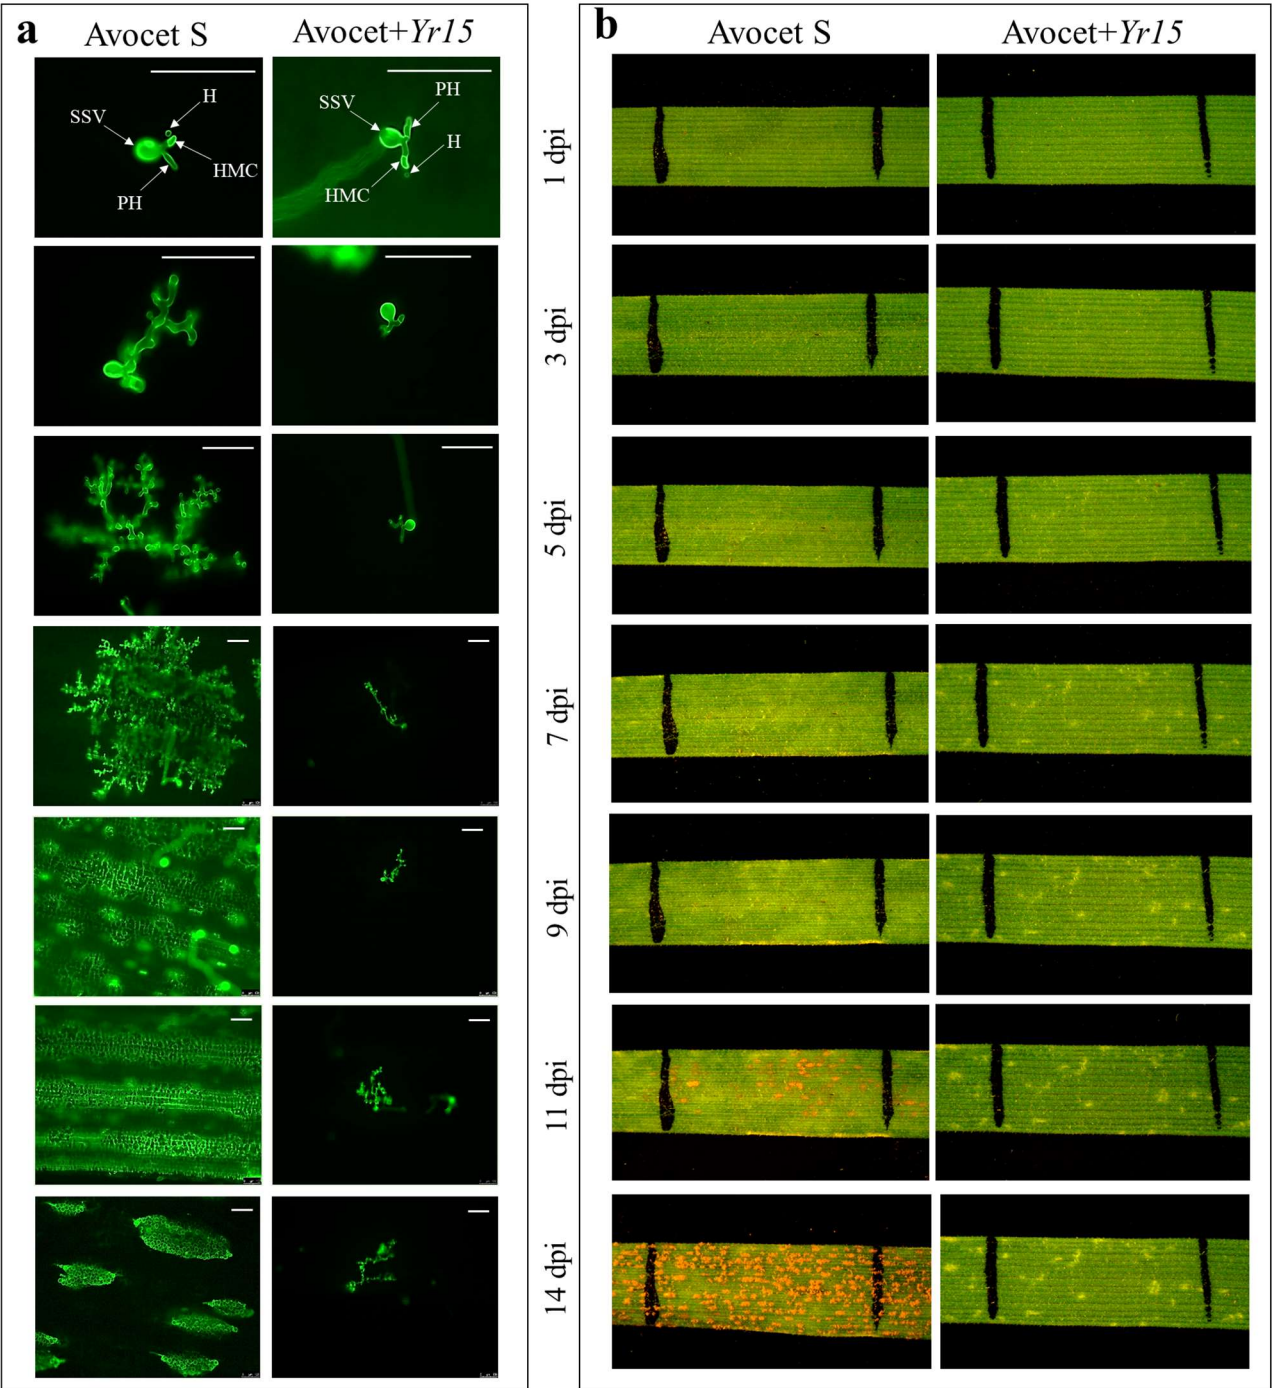

**Supplementary Figure 2. Development of *Pst* within the leaves of susceptible Avocet S and resistant Avocet+Yr15 NILs at different dpi.** **a**, Fungal growth within leaf tissues of NIL host plants over 14 dpi. Scale bar is 100  $\mu$ m; *SSV*, substomatal vesicle; *PH*, primary infection hyphae; *HMC*, haustorial mother cell; *H*, haustorium. **b**, Macroscopic observations of symptom development over 14 dpi, inoculated with *Pst* isolate #5006 in the susceptible line Avocet S as compared to the resistance response of its NIL Avocet+Yr15. The black lines delineate a 1 cm leaf segment in the middle of the second leaf of the same plant followed over 14 days.



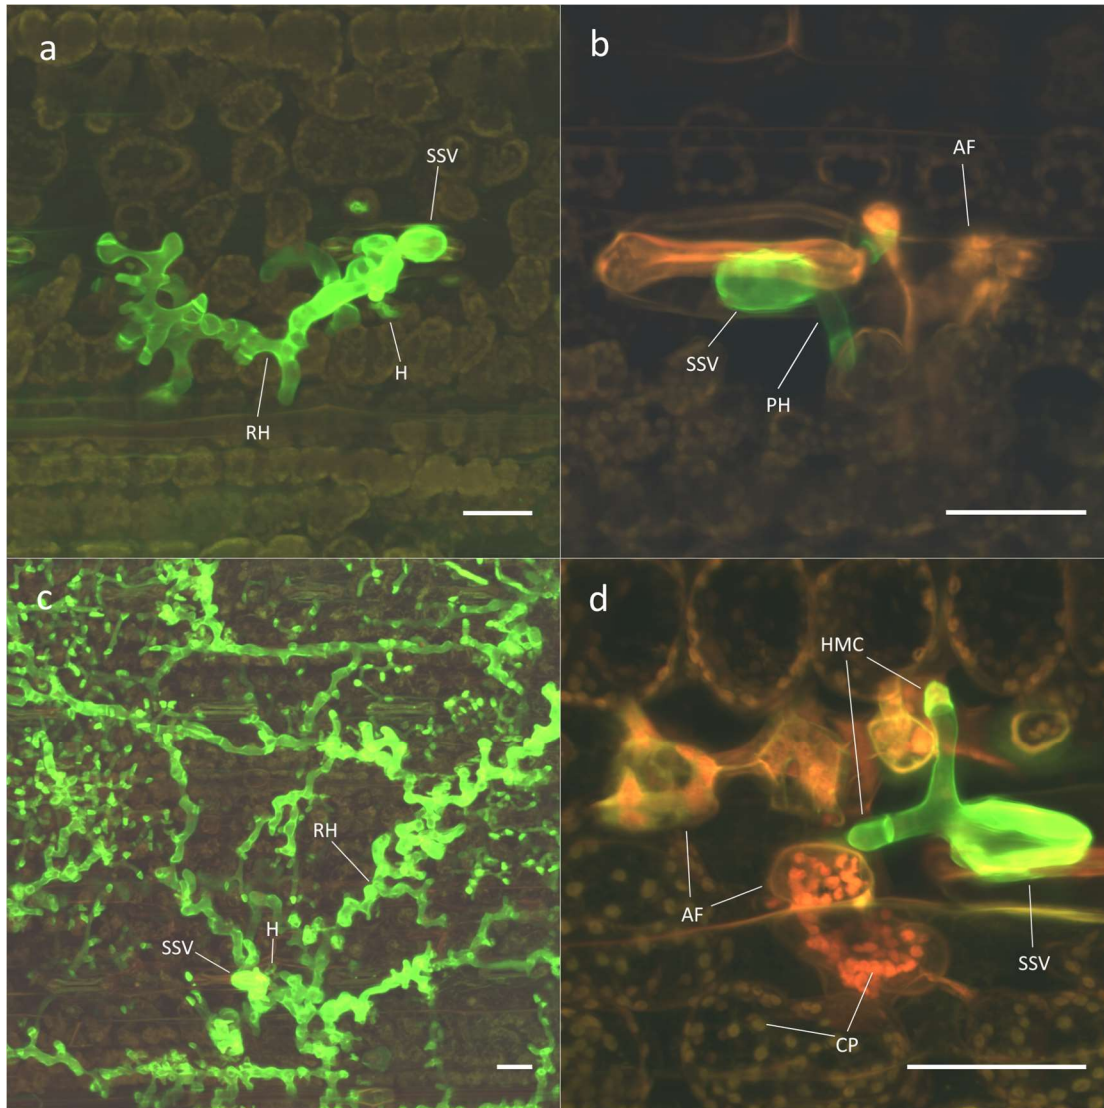

**Supplementary Figure 3. Fungal structures and host responses in the susceptible Avocet S and resistant Avocet+*Yr15* NILs at 4 and 8 dpi with the *Pst* isolate UK75/30.** Fungal structures were stained with the dye Uvitex2B and images acquired by confocal laser scanning microscopy. A 405 nm laser was used to visualize the fungal structures and host cell autofluorescence was recorded with a 515nm laser. **a**, A fungal colony (in bright green) in a leaf of Avocet S 4 dpi. A haustorium (H) is observed close to the substomatal vesicle (SSV) and the colony has started to develop runner hyphae (RH). **b**, A fungal colony in the resistant line Avocet+*Yr15* 4 dpi. The colony have developed two primary infection hyphae (PH), which are both associated with strong plant cell autofluorescence (AF) as a sign of a resistance response. **c**, Fungal structures in Avocet S 8 dpi. The colonies have developed extensive networks of RH containing several haustoria (H) without any signs of host cell autofluorescence. **d**, Host response and fungal structures in Avocet+*Yr15* 8 dpi. The fungal colony consists only of a SSV and two primary infection hyphae with HMCs. Some of the host cells show bright AF and appear to be collapsed and distorted, and a couple of them contain aggregated chloroplasts (CP) with bright orange fluorescence as an indicator of host HR. Bars = 40  $\mu$ m.

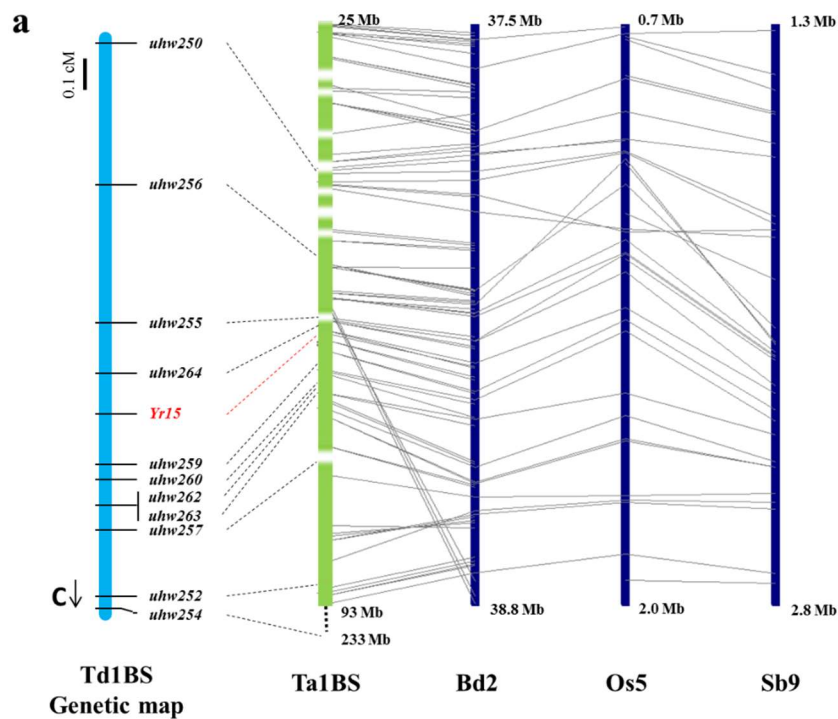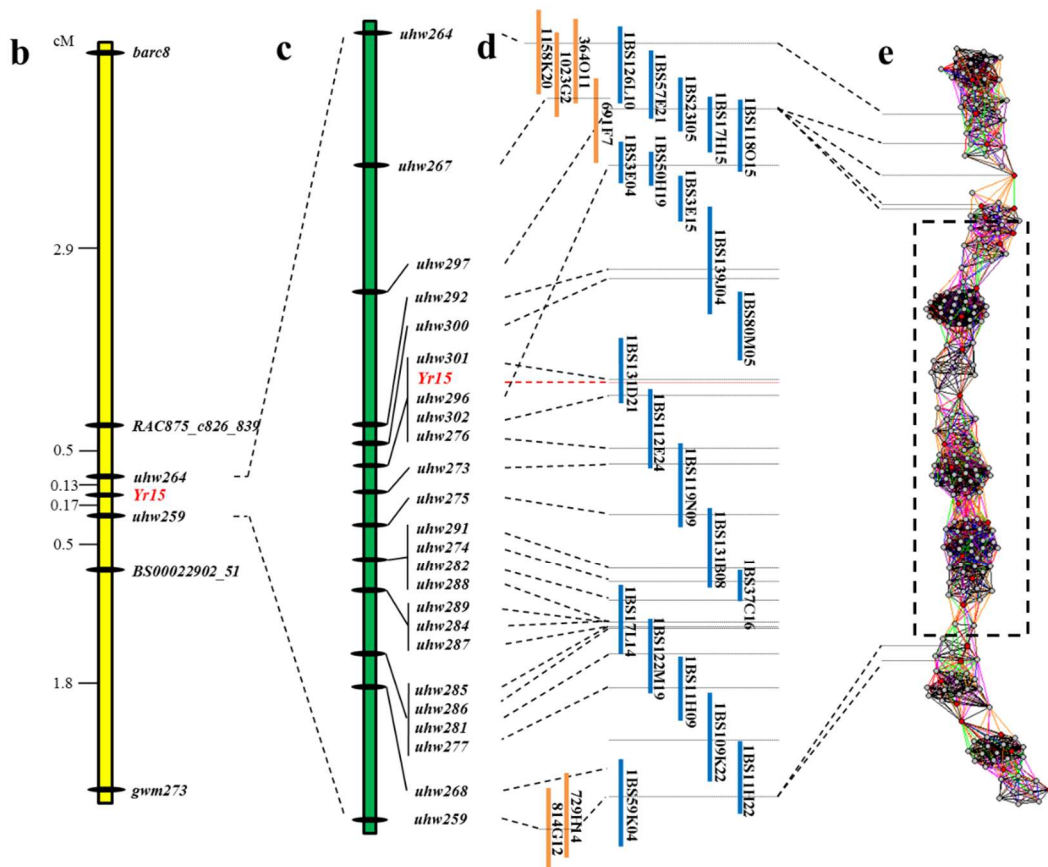

**Supplementary Figure 4. Genetic and physical maps of the *Yr15* region on chromosome**

**arm 1BS. a**, Collinearity of the wheat genetic and physical maps (Td1BS and Ta1BS, respectively) with *B. distachyon* (Bd2), *O. sativa* (Os5), and *S. bicolor* (Sb9). The genetic map of 1BS (blue bar) is based on the D447×B9 mapping population (scale in cM). The anchored CS 1BS (*T. aestivum*) scaffolds<sup>2</sup> are shown as green bars. **b**, The genetic map of the *Yr15* region, which is based on a mapping population of 302 F<sub>2</sub> plants from the D447×B9 cross. **c**, A high-resolution genetic map of the *Yr15* region, which is based on 8,573 F<sub>2</sub> plants, shows a 0.3 cM interval and the relative positions of markers close to *Yr15*. **d**, The order of the six CS BAC clones (orange) and 21 CS 1BS BAC clones (blue) that span the region corresponding to *Yr15* in DIC, as anchored by *uhw264* and *uhw259*<sup>2</sup>. The full names of the BAC clones contain the prefix “TaaCsp” (e.g., TaaCsp1BS126L10 for 1BS126L10). **e**, A part of the CS 1BS physical scaffold, ctg49, which harbors the *Yr15* region, and is presented as a network of clones (nodes) and clone overlaps (edges) that was assembled by the LTC software<sup>2</sup>; clones marked in red represent the minimal tiling path. Network structure shows that most of BACs here were proven by parallel clone overlaps that enabled to include these clones into contigs composing the scaffold. A single scaffold covering *Yr15* region enabled developing of markers used for positional cloning of *Yr15*.

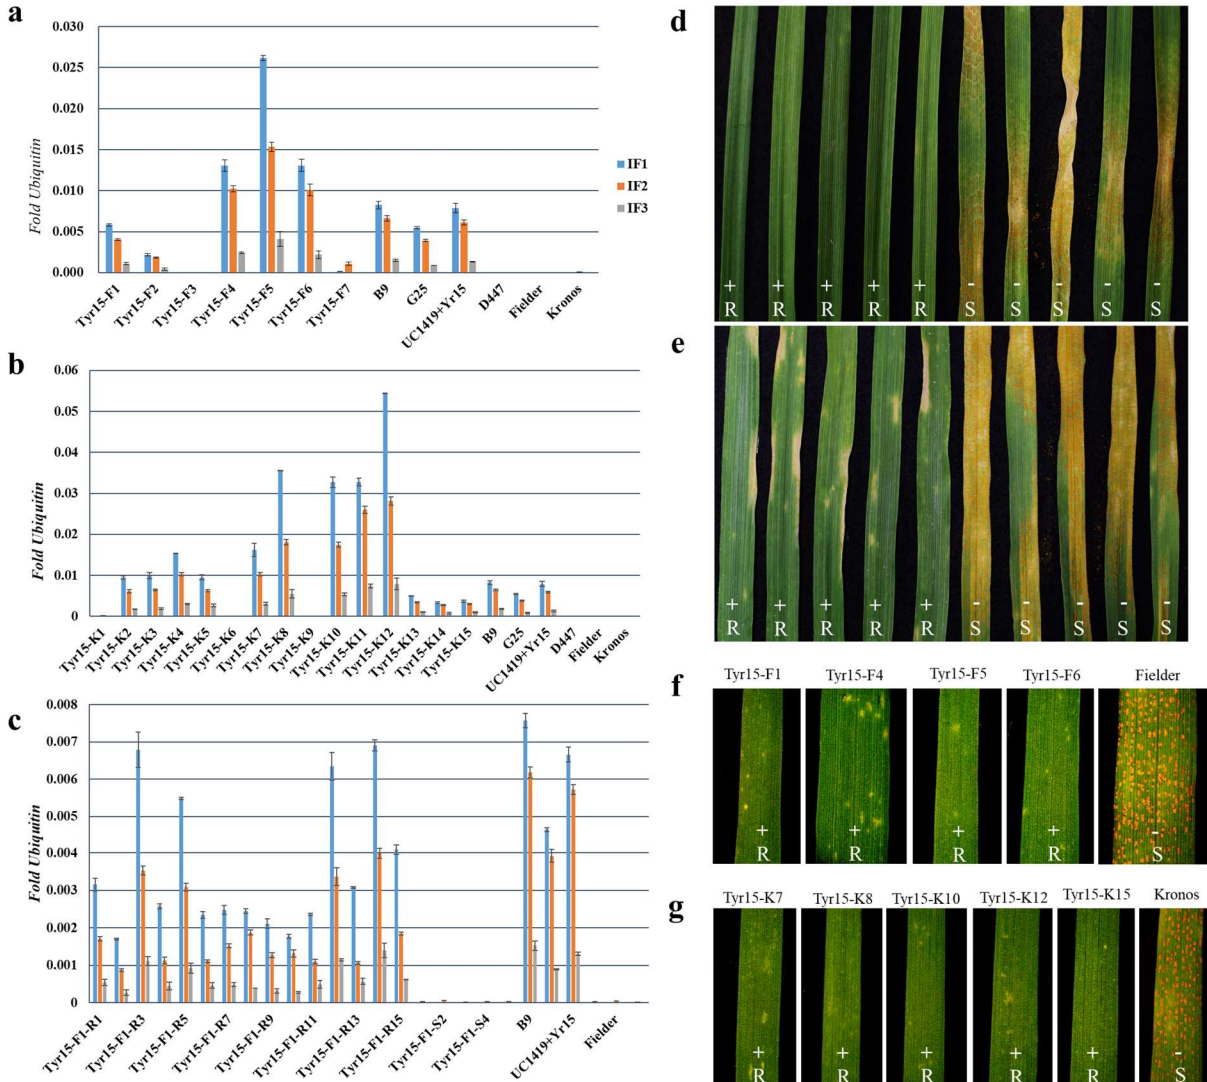

**Supplementary Figure 5. Gain of function complementation.** **a-b**, Transcript levels of the three isoforms (IF1, IF2, and IF3) of *Wtk1* in T<sub>0</sub> transgenic plants in the Fielder (a) background (Tyr15-F1~F7) and Kronos (b) background (Tyr15-K1~K15). Values are in fold-*Ubiquitin* levels calculated with the delta CT method. **c**, Transcript levels of the three isoforms of *Wtk1* in T<sub>1</sub> plants from transgenic event Tyr15-F1. Values are in fold-*Ubiquitin* levels. Error bars denoting s.e.m. are based on three technical replicates (a-c). **d-e**, Co-segregation of the *Wtk1* transgene with the resistance response on T<sub>1</sub> seedlings inoculated with *Pst* race PST-130 from events Tyr15-K8 (d) and Tyr15-F1 (e). Plants from Tyr15-K8 and Tyr15-F1 carrying *Wtk1* (+) showed a typical *Yr15*-mediated yellow rust resistance (R), while progenies without *Wtk1* (-), carrying only *wtk1*, were susceptible (S). **f-g**, Resistance phenotypes in T<sub>2</sub> *Wtk1* transgenic lines on Fielder (f) and Kronos (g) backgrounds inoculated with *Pst* isolate #5006.



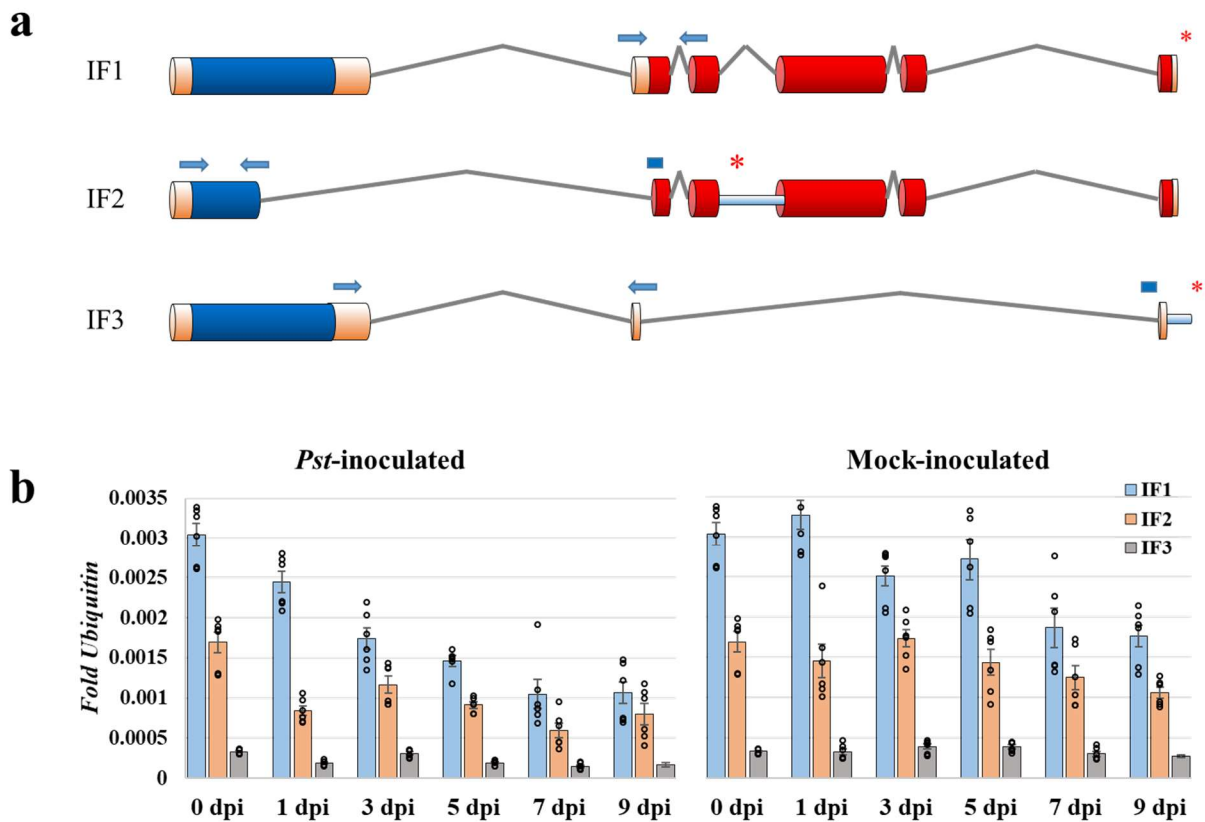

**Supplementary Figure 6. *Wtk1* alternative splice forms.** **a**, Isoform 1 (IF1), which encodes the complete WTK1 protein, is the main isoform, representing 85.7% of the sequenced *Wtk1* transcripts. Isoform 2 (IF2; 9.5%) results from a premature 5' donor splicing site in exon 1 (532 bp before the conserved GT splice site) and an alternative 3' splice acceptor site in exon 2 as well as the retention of intron 3. These differences in splicing generate a premature stop codon in intron 3. Isoform 3 (IF3; 4.8%) derives from the use of both an alternative 3' acceptor site in exon 2 (165 bp before the conserved GT splice site) and a 3' alternative acceptor site in exon 6 (80 bp after the conserved AG splice site), with a putative stop codon in the 3' UTR (77 bp after the conserved TGA). Color codes are as follows: KinI, blue; KinII, red; non-conserved protein parts, light orange. A red star indicates a stop codon. The arrows indicate the location of the primers that were used for expression analyses of the various splice forms. **b**, Transcript levels of the three isoforms of *Wtk1* in mock- or *Pst*-inoculated B9 plants. Error bars denote s.e.m. based on six biological and three technical replicates. The  $p$ -values for the differences between transcript levels of the three *Wtk1* isoforms in leaves of B9 inoculated with *Pst*, relative to mock-inoculated plants, tested by the homogeneity of slopes in GLM analysis, are: IF1,  $p < 0.00044$  (F-test,  $df_1, df_2 = 1, 60$ ), IF2,  $p < 0.00016$  (F-test,  $df_1, df_2 = 1, 60$ ), IF3,  $p < 0.0019$  (F-test,  $df_1, df_2 = 1, 60$ ). The  $p$ -values for the effect of time on expression over 1-9 dpi was calculated for each isoform separately: IF1, *Pst* inoculation ( $p < 8.0 \times 10^{-8}$ , F-test,  $df_1, df_2 = 1, 30$ ) and mock inoculation ( $p < 2.4 \times 10^{-5}$ , F-test,  $df_1, df_2 = 1, 30$ ); IF2, *Pst* inoculation ( $p < 0.22$ , F-test,  $df_1, df_2 = 1, 30$ ) and mock inoculation ( $p < 0.023$ , F-test,  $df_1, df_2 = 1, 30$ ); IF3, *Pst* inoculation ( $p < 0.033$ , F-test,  $df_1, df_2 = 1, 30$ ) and mock inoculation ( $p < 0.11$ , F-test,  $df_1, df_2 = 1, 30$ ).

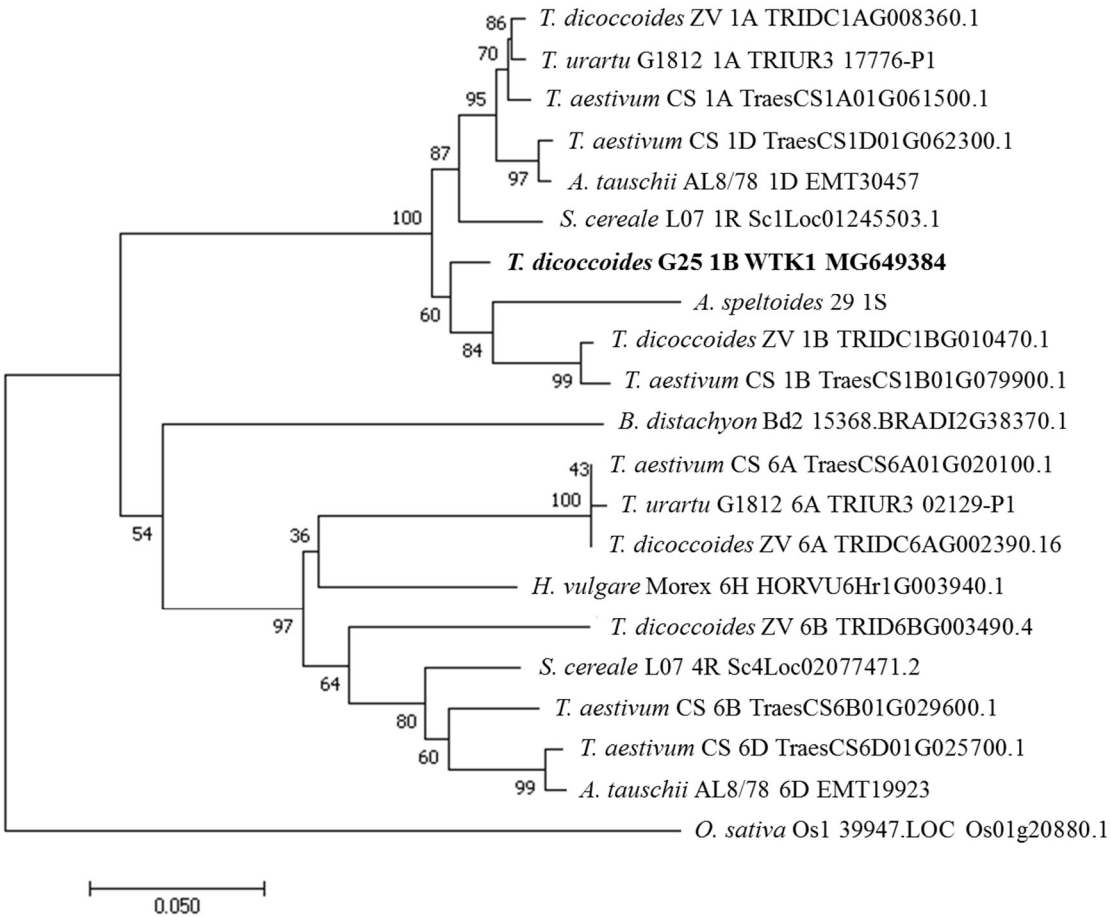

**Supplementary Figure 7. Phylogeny of *WTK1* orthologs and paralogs in cereal species.** The phylogeny of *WTK1* was analyzed using the Neighbor-Joining algorithm, based on evolutionary distances calculated with the Poisson correction method<sup>3</sup>. Branches are labeled with the relevant plant species, abbreviations for the accession name, chromosome location and protein accession number. The numbers at nodes represent the percentage of replicated trees in which the associated taxa were clustered together in the bootstrap test (10,000 replicates).



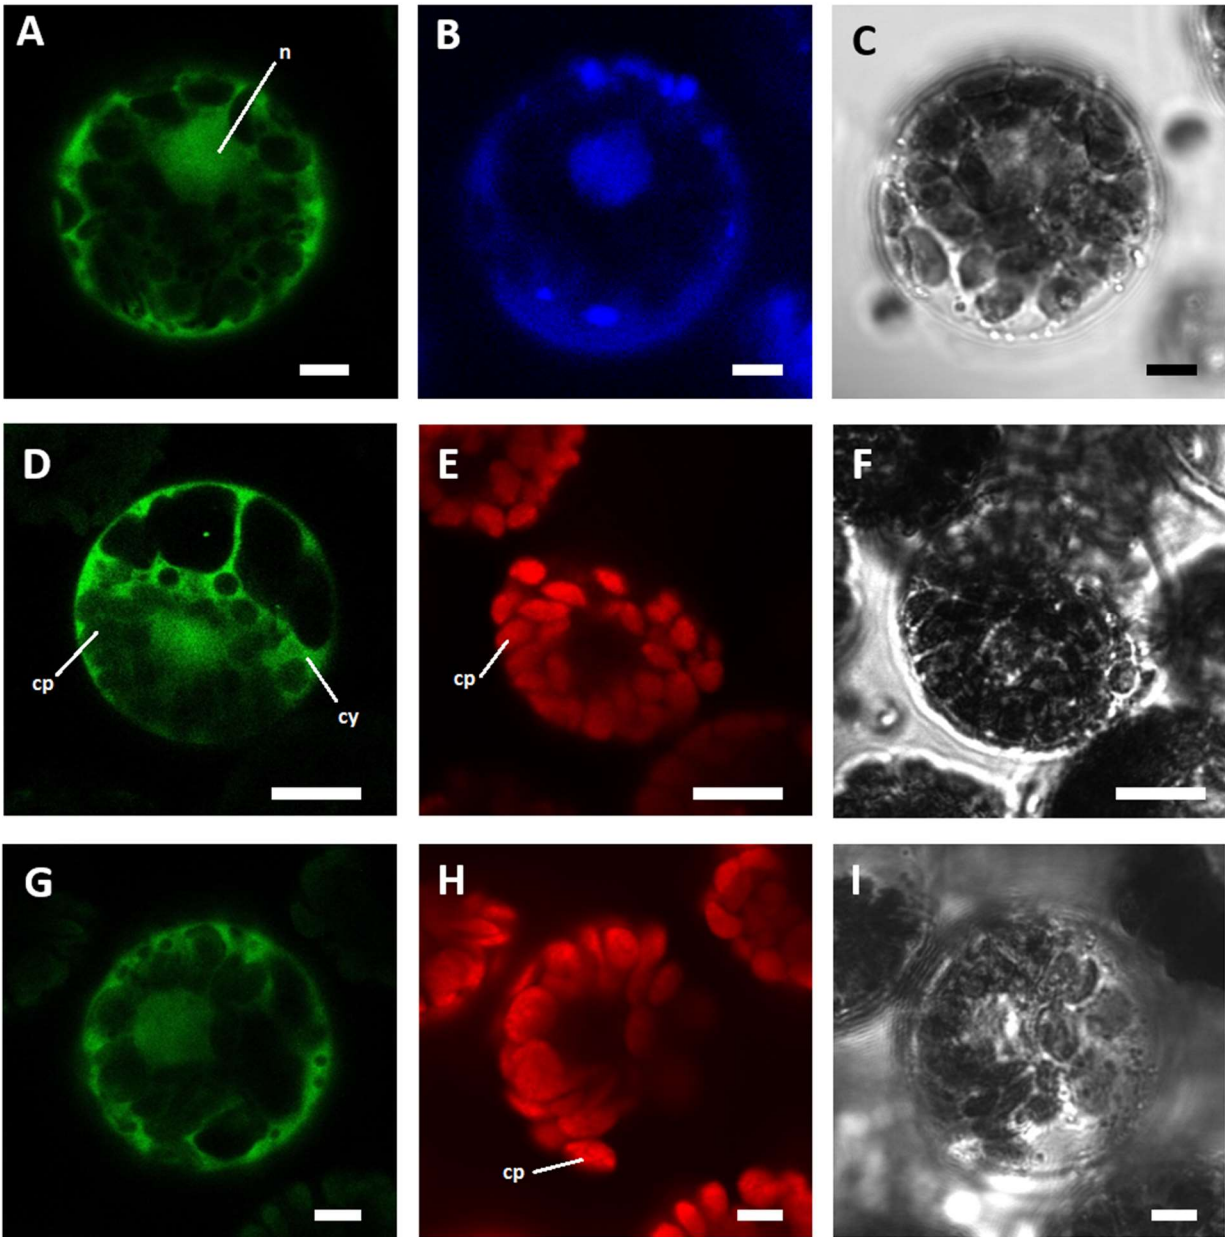

**Supplementary Figure 8. Subcellular localization of WTK1 by transient transformation and expression in barley protoplasts.** Fusions of GFP to the C-termini of (A) KinI, amino acids 1-326, (D) the KinII, amino acids 346-665, and (G) the entire WTK1 open reading frame expressed in barley protoplasts. (B) DAPI and (E, H) chloroplast auto-fluorescence of the cells in their respective rows. (C, F, I) bright-field visualization of the cells in their rows. Example chloroplasts (cp), cytoplasm (cy), and nuclei (n) are indicated. Scale bar is 5  $\mu$ m except in (D), (E), and (F), where it is 10  $\mu$ m.

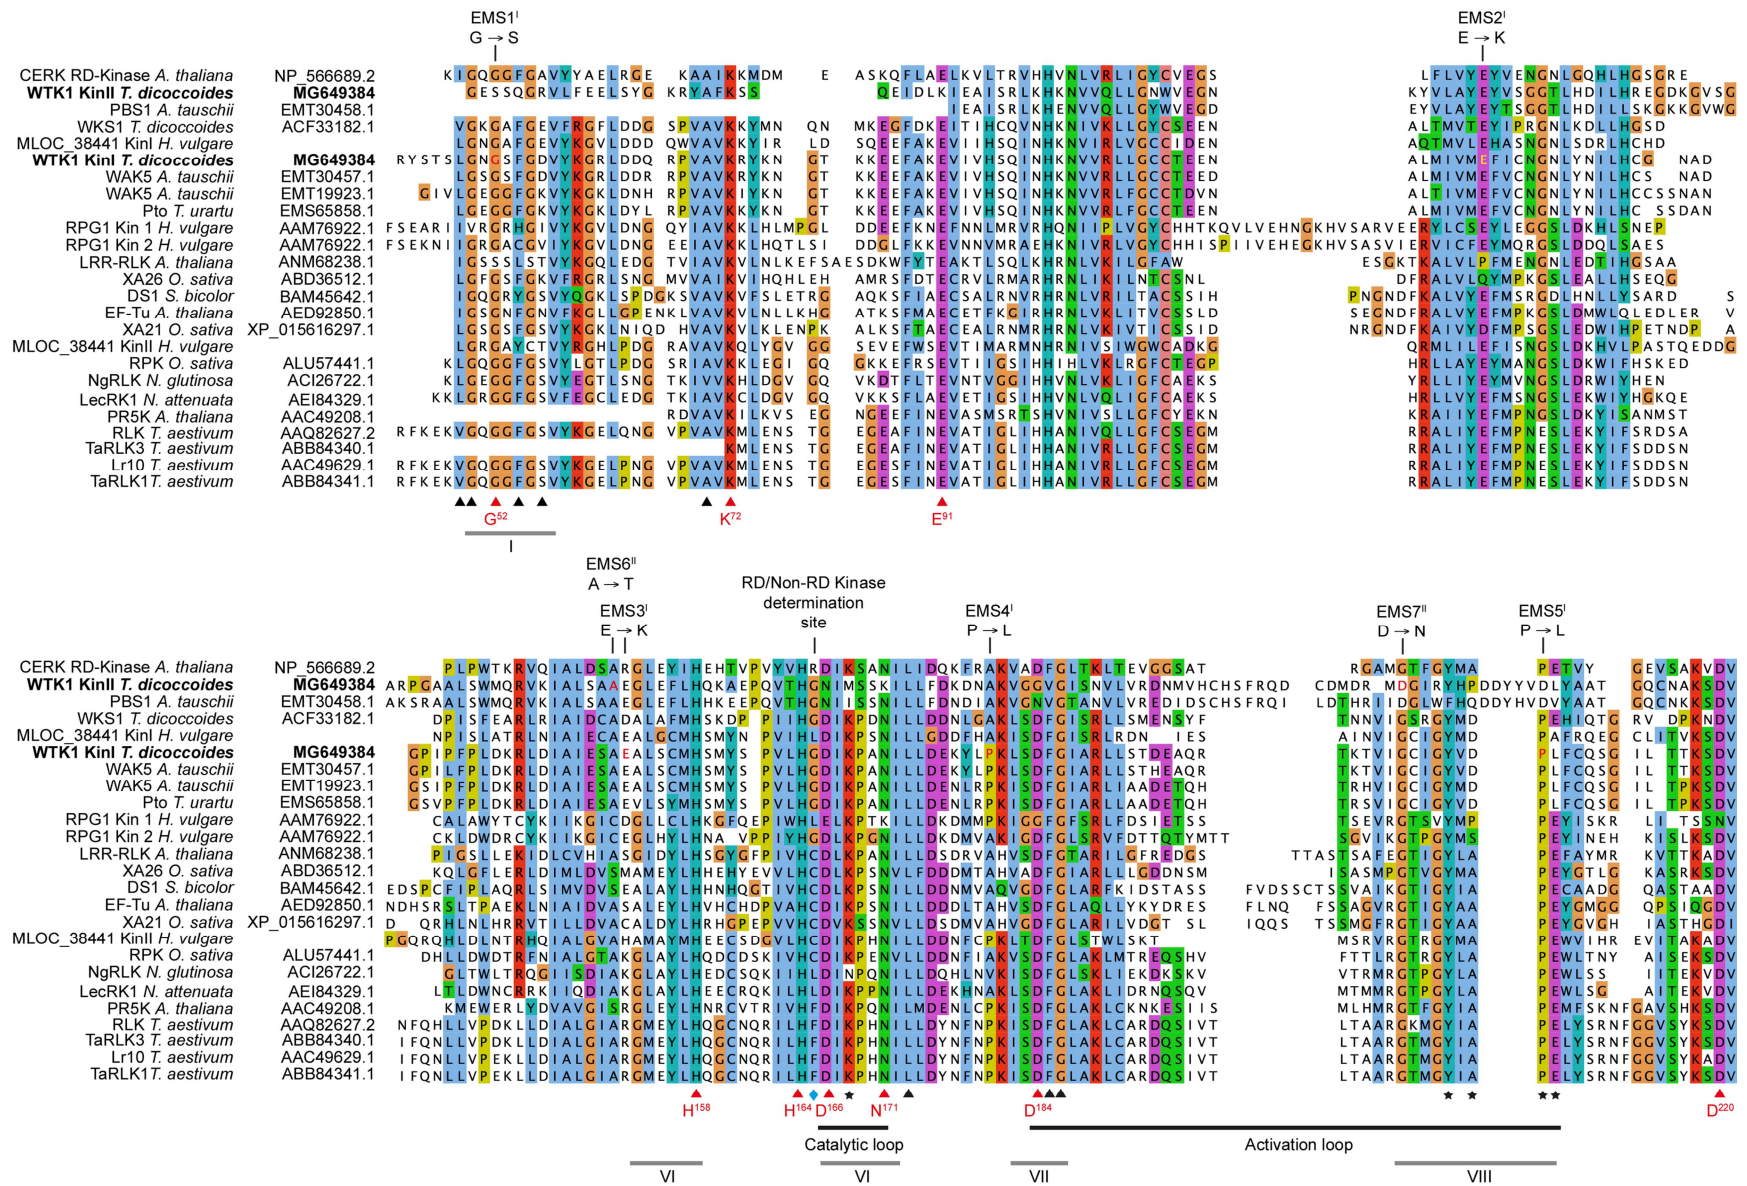





**Supplementary Figure 9. Predicted WTK1 protein structure.** Multiple alignment of 25 protein kinase domains used to infer the architecture of WTK1. In KinI (row 6), 13 out of the 14 key conserved residues of a protein kinase<sup>4</sup> are present. In the following description, these conserved residues are labelled with upper case numbers representing their position in the  $\alpha$  form of the cAMP-dependent protein kinase catalytic subunit (cAPK). The nearly invariant residues of subdomain I (G-X-G<sup>52</sup>-X-X-G) around the central G<sup>52</sup> residue and subdomain VII (D<sup>184</sup>, F<sup>185</sup>, G<sup>186</sup>) are conserved in WTK1 KinI, while the positions corresponding to cAPK A<sup>206</sup> (D), P<sup>207</sup> (P), and F<sup>208</sup> (L) in subdomain VIII satisfy the consensus motif observed in 92 putative plant kinase domains (Fig. 4b). Based on the presence of a G residue in place of cAPK R<sup>165</sup> in subdomain VI, WTK1 KinI was classified as a non-RD kinase. Furthermore, conserved residues in subdomains VI (cAPK D<sup>166</sup> through N<sup>171</sup>) and VIII (immediately upstream of cAPK A<sup>206</sup>) indicate that WTK1 KinI is a serine/threonine protein kinase. In WTK1 KinII (row 2), 7 out of the 14 key conserved residues are strongly conserved and 5 positions have similar substitutions, placing it within the superfamily of protein kinase catalytic domains and therefore considered a putative pseudokinase. A fine-grained classification as RD or non-RD kinase or as serine/threonine or tyrosine kinase is not possible, because D<sup>166</sup> has been substituted with an N residue and the diagnostic regions in subdomains VI and VIII are not conserved.

Labels: black triangles, ATP binding site; black stars, substrate binding site; red triangles, key conserved residues. The cyan diamond highlights the position within the catalytic loop that determines whether a kinase belongs to the RD (R, D; e.g. CERK in row 1) or non-RD (not R, D) group. Core conserved, diagnostic regions of subdomains I, VI, VII, and VIII are highlighted by grey bars labelled with Roman numerals. Amino acids altered by EMS mutagenesis that resulted in loss of WTK1 function are indicated by red or yellow letters. EMS mutagenized line designations, affected kinase domains (highlighted by <sup>I</sup> or <sup>II</sup>), and associated amino acid changes are indicated above the respective alignment column.



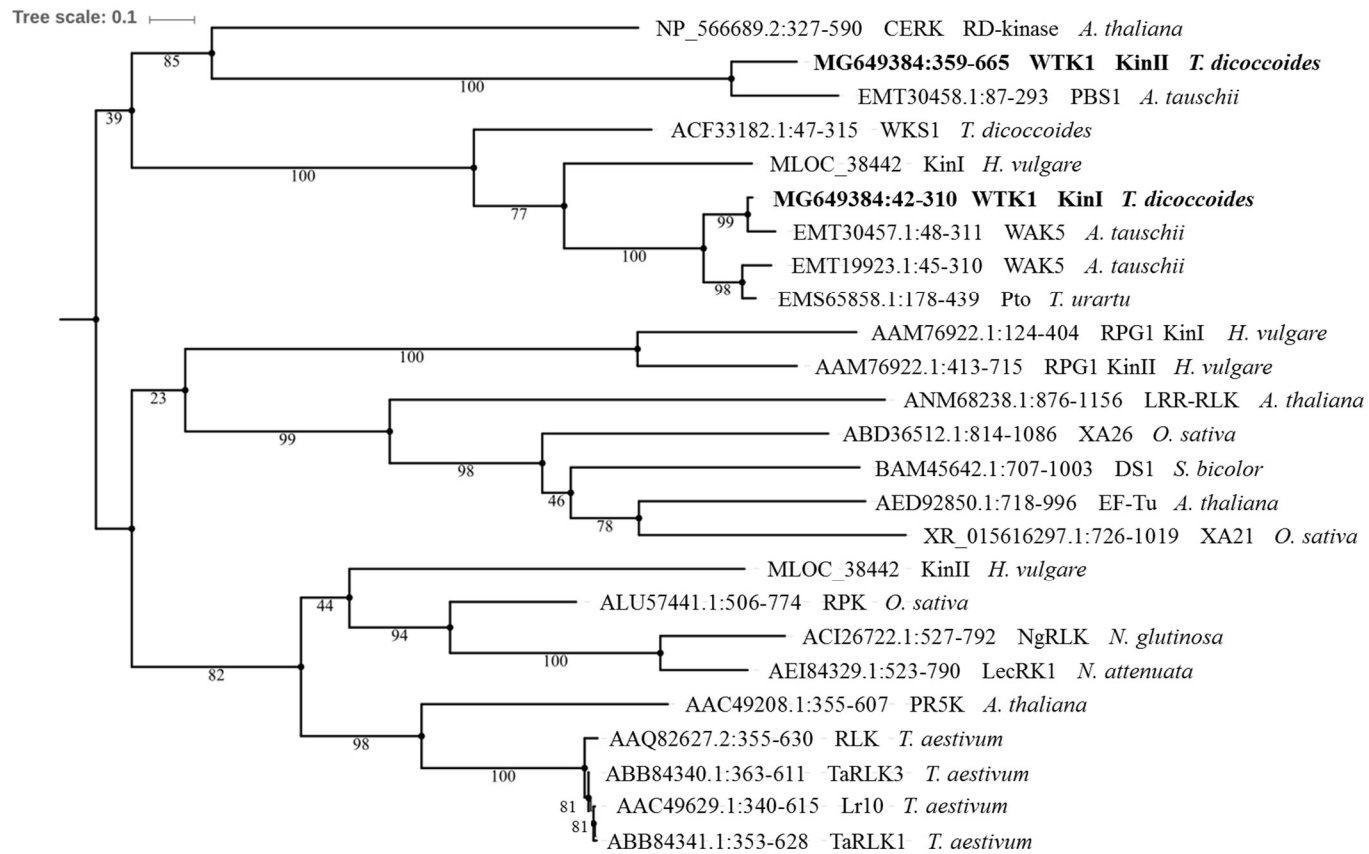

**Supplementary Figure 10. Phylogenetic analysis of kinase domains from plant pattern recognition receptors (PRRs) and those predicted for WTK1.** The phylogenetic tree is based on the kinase domain of each protein accession. The location of the domain is indicated by the sequence range numbers after the colon. The numbers at branch points represent the bootstrap values (% of 1,000 replicates). Branches are labeled with protein accession numbers, protein abbreviations, and the relevant plant species.



**Supplementary Figure 11. Phylogenetic analysis of predicted tandem kinase-pseudokinase proteins from across the plant kingdom. a,** Phylogram of 184 putative kinase domains of TKPs predicted from DNA sequences, which comprise 11 clades and 2 singletons. Each clade is similar to a specific family or sub-family of kinases from *Arabidopsis*<sup>5</sup>. KinI domains are labeled as K1 (solid line), and KinII domains as K2 (dash line).

Clade 1 is similar to LRR\_6B (leucine-rich-repeat receptor kinase subfamily 6B). All of the domains in this clade are KinII domains and hence represent fusion TKPs.

Clade 2 is similar to RLCK\_7 (receptor-like cytoplasmic kinase subfamily 7). All of the domains in this clade are members of wheat TKPs. This clade is composed of two well-supported nodes: one represents two TKPs derived from duplication events, and the second represents three KinII domains from fusion events.

Clade 3 is similar to LRR\_3 (leucine-rich-repeat receptor kinase subfamily 3) and includes highly similar KinII domains from wheat, rye and sorghum.

Clade 4 is similar to RLCK\_8 (receptor-like cytoplasmic kinase subfamily 8) and includes only KinII domains. One node comprised of 1BS WTK1 from WEW and orthologs of *T. aestivum* group 1 chromosomes, and a second node with paralogs of group 6 chromosomes of *T. aestivum* and *H. vulgare*.

Clade 5 is similar to the WAK family (cell wall-associated kinases) and includes a well-supported node with a cluster of KinI domains, four strongly supported nodes of KinII domains, and three singletons that are not resolved from the base of Clade 10.

Clade 6 is similar to L-LPK (concanavalin A-like lectin protein kinases). The clade derives from a single ancient duplication event (includes monocots and dicots) and contains two large sub-clades of KinI and KinII, respectively.

Clade 7 is related to RK\_1 sub-family (other kinases with no published family) and includes one TKP from maize; and KinI of potato.

Clade 8 is similar to RK\_1 sub-family (other kinases with no published family) and includes KinII of barley MLOC 36442 as well as its homolog from rice.

Clade 9 is similar to the RLCK\_7 sub-family (receptor-like cytoplasmic kinase subfamily 7) and is composed of a single pair of domains from rapeseed.

Clade 10 is similar to the LRR\_12 sub-family (leucine-rich-repeat receptor kinase subfamily 12) and contains one TKP comprised of very similar KinI-KinII pair from rice.

Clade 11 is comprised of two large clusters:

11.1 is similar to soluble kinases and includes members of five families: the MAP3K-raf sub-family (raf-like MAPK kinase kinase) from rapeseed and moss; the CDK family (cyclin dependent kinases); the AGC family (cATP-, cGTP- and phospholipid-dependent kinases) from rapeseed; as well as a KinII of the SnRK3 family (SNF1-related kinase 3) from barley and KinII of the MAP3K family (MAP3K kinase) from sorghum.

11.2 constitutes a large group of TKPs, corresponding to the LRR\_8B sub-family (cysteine rich kinases). This cluster includes three singletons and five nodes. Singletons contain two KinI domains from rye and sorghum and KinII domain from maize. The largest node includes KinI domains from wheat, barley, rye, and maize. The next three nodes include a mix of KinI and KinII of four TKPs from maize, and single TKPs from barley, rye and sorghum. The last node includes the barley RPG1 KinI and KinII, their paralogs on chromosome 7H, and some homologs in wheat represented by KinI domains and both domains from sorghum.

The origins of sequences are coded as follows: Traes, wheat, *T. aestivum*; HORVU, barley, *H. vulgare*; Os, rice, *O. sativa*; AQB and ONM, maize, *Z. mays*; Sc, rye, *S. cereale*; SOBIC, sorghum, *S. bicolor*; PGSC, potato, *S. tuberosum*; Potri, black cottonwood, *Populus trichocarpa*; Bna, rapeseed or canola, *Brassica napus*; AT, *A. thaliana*; Pp, moss, *Ph. patens*.

**b,** Combinations of domains from kinase families and subfamilies resulted in tandem kinase-pseudokinase architecture of TKP family members.

**Supplementary Table 1. Graphical genotyping and phenotyping of 13 selected RILs with the closest recombination events flanking *Yr15*.** Homozygous RILs were tested for resistance to *Pst* isolate #5006. Marker alleles shown in yellow are identical to those obtained for the resistant parental line B9 (labeled B); marker alleles shown in green are identical to those obtained for the susceptible parental line D447 (D). Resistance (R) or susceptibility (S) to *Pst* is specified and highlighted, respectively, in yellow or green.

| Markers/<br>Parents and<br>RILs | <i>uhw264</i> | <i>uhw297</i> | <i>uhw292</i> | <i>uhw300</i> | <i>uhw301</i> | <i>Yr15</i> | <i>uhw296</i> | <i>uhw302</i> | <i>uhw276</i> | <i>uhw273</i> | <i>uhw275</i> | <i>uhw291</i> | <i>uhw274</i> | <i>uhw259</i> |
|---------------------------------|---------------|---------------|---------------|---------------|---------------|-------------|---------------|---------------|---------------|---------------|---------------|---------------|---------------|---------------|
| B9                              | B             | B             | B             | B             | B             | R           | B             | B             | B             | B             | B             | B             | B             | B             |
| D447                            | D             | D             | D             | D             | D             | S           | D             | D             | D             | D             | D             | D             | D             | D             |
| B10-50-5-4                      | B             | D             | D             | D             | D             | S           | D             | D             | D             | D             | D             | D             | D             | D             |
| B10-52-54-8                     | D             | B             | B             | B             | B             | R           | B             | B             | B             | B             | B             | B             | B             | B             |
| B9-110-24-3                     | B             | B             | D             | D             | D             | S           | D             | D             | D             | D             | D             | D             | D             | D             |
| B9-14-14-7                      | D             | D             | B             | B             | B             | R           | B             | B             | B             | B             | B             | B             | B             | B             |
| B9-205-19-3                     | D             | D             | D             | B             | B             | R           | B             | B             | B             | B             | B             | B             | B             | B             |
| B9-L24-53-4                     | B             | B             | B             | B             | D             | S           | D             | D             | D             | D             | D             | D             | D             | D             |
| B9-167-105-1                    | D             | D             | D             | D             | D             | S           | D             | D             | D             | B             | B             | B             | B             | B             |
| B9-208-9-16                     | D             | D             | D             | D             | D             | S           | D             | D             | D             | D             | B             | B             | B             | B             |
| B9-183-45-1                     | B             | B             | B             | B             | B             | R           | B             | B             | B             | B             | B             | D             | D             | D             |
| B9-14-23-15                     | D             | D             | D             | D             | D             | S           | D             | D             | D             | D             | D             | B             | B             | B             |
| B9-L70-33-13                    | B             | B             | B             | B             | B             | R           | B             | B             | B             | B             | B             | B             | D             | D             |
| B9-167-63-1                     | B             | B             | B             | B             | B             | R           | B             | B             | B             | B             | B             | B             | B             | D             |
| B9-112-22-2                     | D             | D             | D             | D             | D             | S           | D             | D             | D             | D             | D             | D             | D             | B             |



**Supplementary Table 2. Description of PCR markers in the *Yr15* region developed from wheat ESTs assigned to deletion bin Sat0.31.**

| <b>Marker name*</b> | <b>EST<sup>†</sup></b> | <b>Primer sequence</b>                         | <b>Fragment size (bp)</b> | <b>Annealing temp (°C)</b> | <b>Restriction enzyme</b> | <b>Parental alleles (bp)</b> |
|---------------------|------------------------|------------------------------------------------|---------------------------|----------------------------|---------------------------|------------------------------|
| <i>uhw250</i>       | BG275046               | CTGCTCACTTTTTGCCTGTG<br>AAAAGTTGTTGCTCTGCTTTT  | 1355                      | 50                         | -                         | B9: 1355<br>D447: Null       |
| <i>uhw252</i>       | BG607503               | GGTTTTCACTGAATCAATAGGG<br>ATGAACCCAGCCAGTCTGAT | 550                       | 57                         | <i>SspI</i>               | B9: 552<br>D447: 328, 222    |
| <i>uhw254</i>       | BG608205               | CAATCCCAAGCTGACTGAAA<br>ACACCGCTGGTATTGTAGCC   | 737                       | 60                         | <i>AluI</i>               | B9: 479, 258<br>D447: 737    |

\*Marker order, from distal to proximal in relation to *Yr15*, is described in Supplementary Fig. 3a.

<sup>†</sup>ESTs assigned to deletion bin Sat0.31<sup>6</sup>.

**Supplementary Table 3. Description of markers in the *Yr15* region developed using collinearity to *B. distachyon*, *O. sativa*, and *S. bicolor***

| Marker Name   | EST / Unigene   | Primer Sequence                                         | Frag. Size (bp) | Annealing Temp. (°C) | Restr. Enzyme | Parental alleles (bp)                                              | <i>B. distachyon</i> homolog | <i>O. sativa</i> homolog    | <i>S. bicolor</i> homolog |
|---------------|-----------------|---------------------------------------------------------|-----------------|----------------------|---------------|--------------------------------------------------------------------|------------------------------|-----------------------------|---------------------------|
| <i>uhw256</i> | <i>HU35_455</i> | GTTACCCTCCACAGCAAGGT<br>GCGCATTACTTCCACTTCTTG           | 949             | 59                   | <i>AluI</i>   | B9: 347, 310,<br>203, 60, 29<br>D447: 657, 203,<br>60, 29          | <i>Bradi2g3769</i><br>0.1    | <i>LOC_Os05g0</i><br>2780.1 | <i>Sb09g001970</i>        |
| <i>uhw255</i> | <i>CJ661523</i> | GATGCTCTGCACATGTGTTATG<br>GCAGCTCCAGCTTATTCGTC          | 753             | 55                   | <i>MseI</i>   | B9: 243, 184,<br>150, 149, 71, 25<br>D447: 333, 243,<br>81, 71, 25 | <i>Bradi2g3787</i><br>0.1    | <i>LOC_Os05g0</i><br>3100.1 | <i>Sb09g002120</i>        |
| <i>uhw264</i> | <i>CA730189</i> | GGTCTCTTGCAACATACAGTAACAA<br>GAGTGGTAGTCTAGTAGAGGTTGGTG | 247,<br>215     | 58                   |               | B9: 215<br>D447: 247                                               | <i>Bradi2g3792</i><br>0.1    | <i>LOC_Os05g0</i><br>3120.1 | <i>Sb09g002140</i>        |
| <i>uhw259</i> | <i>CD927978</i> | CTGTATTCTAATGCAGATTAGCTGTT<br>CACGCATAATTTTGTCCACAC     | 302             | 57                   | <i>BsrI</i>   | B9: 112, 100, 90<br>D447: 190, 112                                 | <i>Bradi2g3795</i><br>0.1    | <i>LOC_Os05g0</i><br>3140.1 | <i>Sb09g002180</i>        |
| <i>uhw260</i> | <i>CK155408</i> | GAGACGAACGAAACCGAGAT<br>GATAGTGCAATTGGTGGAAGG           | 381             | 58                   | <i>EcoRV</i>  | B9: 300, 81<br>D447: 381                                           | <i>Bradi2g3797</i><br>0.1    | <i>LOC_Os05g0</i><br>3174.1 | <i>Sb09g002200</i>        |
| <i>uhw262</i> | <i>BQ161309</i> | TTTGCTTTGGAGTCCGAGTT<br>TTTGCAAAAGTAATCCTGGACA          | 915             | 59                   | <i>NlaIV</i>  | B9: 915<br>DW1: 674, 241                                           | <i>Bradi2g3803</i><br>0.1    | <i>LOC_Os05g0</i><br>3430.1 | <i>Sb09g002225</i>        |
| <i>uhw263</i> | <i>CJ841447</i> | CACCAGTAGATCCTCAACAATACA<br>CTGAGAATGGAATGCAACGTAG      | 539             | 58                   | <i>DraIII</i> | B9: 539<br>D447: 344, 195                                          | <i>Bradi2g3803</i><br>0.1    | <i>LOC_Os05g0</i><br>3430.1 | <i>Sb09g002225</i>        |
| <i>uhw257</i> | <i>CJ582219</i> | TCTTACTTGTTACAAAACTGAGG<br>GCGCATGAGGAGCTTGAC           | 834             | 57                   |               | B9: Null<br>D447: 834                                              | <i>Bradi2g3817</i><br>0.1    | <i>LOC_Os05g0</i><br>3610.1 | <i>Sb09g002320</i>        |

**Supplementary Table 4. Description of KASP markers in the *Yr15* region developed based on SNPs from the wheat 15K SNP array.**

| Marker name            | Primer sequence A      | Primer sequence B      | Primer sequence Common  |
|------------------------|------------------------|------------------------|-------------------------|
| <i>RAC875_c826_839</i> | ACGAAGGTTCTGTTTTTCACCA | ACGAAGGTTCTGTTTTTCACCG | TCTTCTTGCTCAAAGGTAAGAGT |
| <i>BS00022902_51</i>   | ATGTGCGGCAGGAGAAGA     | ATGTGCGGCAGGAGAAGG     | ATACTCTTCACGGTCGTCCTC   |

**Supplementary Table 5. Molecular markers developed from the physical map of chromosome arm 1BS of CS<sup>2</sup> and from the G25 BAC clone G25-64.**

| Marker Name   | Marker Type                | Sequence based design                          | Primer Sequences                                        | Length (bp) | Conditions*  | Enzyme        | Parental alleles (bp)                                                                    | 1BS BAC clone <sup>†</sup> |
|---------------|----------------------------|------------------------------------------------|---------------------------------------------------------|-------------|--------------|---------------|------------------------------------------------------------------------------------------|----------------------------|
| <i>uhw267</i> | Genetic, co-dominant, CAPS | BES Sanger, BlastN EST CJ883493                | TGGTAATCAAGTTTCACATTGT<br>TCA<br>GGAAGGACACCTTTTCGGTATT | 696         | 65/55; 0'40" | <i>NheI</i>   | B9: 696<br>D447: 542, 172                                                                | TaaCsp1BS057E21            |
| <i>uhw297</i> | Genetic, co-dominant, CAPS | PacBio, Uniprot                                | CAGATGACCAACCAAAAGCA<br>GTCATATTGGTGCCAGTGA             | 487         | 65/55; 0'40" | <i>BauI</i>   | B9: 487<br>D447: 450, 37                                                                 | TaaCsp1BS118O15            |
| <i>uhw292</i> | Genetic, B9 dominant       | BES IWGSC BLAST, BlasttX, Protein EMT24064     | GACTTTCTTCCCTCGGGACT<br>CTCGCACGCTATAAAAAGGA            | 1,000       | 65/55; 1'00" | -             | B9: 1000<br>D447: null                                                                   | TaaCsp1BS139J04            |
| <i>uhw296</i> | Genetic, co-dominant, CAPS | PacBio, BlastX, Proteins EMS53293 and EMT11639 | CAACCGTGCTCCAAACA<br>CGGGTGTGTCCGTTGAG                  | 497         | 65/55; 0'50" | <i>NlaIV</i>  | B9: 321, 176<br>D447: 299, 176, 22                                                       | TaaCsp1BS050H19            |
| <i>uhw276</i> | Genetic, co-dominant, CAPS | BES, 454, BlastX, Protein EMT12025             | TCTGTGATGCCTGTGATGGT<br>AAAGTTTGGGATTTGGCAAT            | 755         | 55; 0'40"    | <i>TaqI</i>   | B9: 309, 163, 73,<br>72, 71, 47, 20<br>D447: 182, 163,<br>127, 74, 73, 69, 47            | TaaCsp1BS112E24            |
| <i>uhw273</i> | Genetic, co-dominant, CAPS | BES, BlastX, Protein EMT27971, RGA             | GGTGACGGCGAGTGTACG<br>GACGCAATTGTCCGCTGT                | 242         | 62/52; 0'25" | <i>EagI</i>   | B9: 149, 93<br>D447: 242                                                                 | TaaCsp1BS112E24            |
| <i>uhw275</i> | Genetic, co-dominant, CAPS | 454, BlastX, Protein EMS52762                  | CAATGCTCGTAGCTGTTCCA<br>GAGCATTGTTGGGGTTG               | 549         | 65/55; 0'30" | <i>TaiI</i>   | B9: 344, 205<br>D447: 344, 147, 58                                                       | TaaCsp1BS119N09            |
| <i>uhw291</i> | Genetic, co-dominant, CAPS | 454, ISBP Finder TE junction                   | TGTTGCTATGCCATCACCAT<br>CTATAACCGCTGGTGGGAGAA           | 285         | 65/55; 0'30" | <i>MspI</i>   | B9: 142, 94, 49<br>D447: 143, 142                                                        | TaaCsp1BS131B08            |
| <i>uhw274</i> | Genetic, co-dominant, CAPS | 454, BlastX, Protein EMS64309                  | AAGCTCCGCTGCAATGAC<br>ACCTGACATCCTCGAACCAC              | 314         | 65/55; 0'30" | <i>HaeIII</i> | B9: 196,118<br>D447: 314                                                                 | TaaCsp1BS037C16            |
| <i>uhw282</i> | Genetic, co-dominant, CAPS | 454, BlastX, Protein EMT33303                  | TAATGTTTGGACGAGGCACA<br>TTTTTACTTGTGCTTGTTACA<br>ATTT   | 815         | 65/55; 0'40" | <i>AciI</i>   | B9: 223, 214, 142,<br>130, 93, 10<br>D447: 359, 223,<br>130, 93, 10                      | TaaCsp1BS017L14            |
| <i>uhw288</i> | Genetic, co-dominant, CAPS | 454, ISBP Finder TE junction                   | GAGAGGGTTGACCTACGTGC<br>GTGTATTGGAGTTGTGGCCC            | 1,567       | 65/55; 1'30" | <i>MseI</i>   | B9: 377, 376, 304,<br>196, 172, 112, 24, 6<br>D447: 549, 376, 248<br>196, 112, 57, 24, 6 | G25-64                     |
| <i>uhw289</i> | Genetic, co-dominant, CAPS | 454, ISBP Finder TE junction                   | ATTTGCCTCTTCGCAATGAC<br>TTTGCAAGAACTCGCAATG             | 2,420       | 65/55; 1'30" | <i>SacII</i>  | B9: 1984, 436<br>D447: 1191, 786,<br>436                                                 | G25-64                     |

|               |                                |                                                      |                                              |     |              |               |                                                                                    |                 |
|---------------|--------------------------------|------------------------------------------------------|----------------------------------------------|-----|--------------|---------------|------------------------------------------------------------------------------------|-----------------|
| <i>uhw280</i> | Physical                       | 454, BlastX, Protein<br>BAJ96492                     | GCCTCCTGTACTAGCCGAAA<br>GCTAGGGTTCGGGTCTCTCT | 183 | 65/55; 0'30" | -             | B9: 183<br>D447: Null                                                              | TaaCsp1BS122M19 |
| <i>uhw284</i> | Genetic, D447<br>dominant      | 454, ISBP Finder TE<br>junction                      | TACTCTGTGCCTCTGGTCCC<br>GACGGAGACCTGCAAACAGT | 279 | 60; 0'30"    | -             | B9: Null<br>D447: 279                                                              | TaaCsp1BS017L14 |
| <i>uhw287</i> | Genetic, B9<br>dominant        | 454, Geneious annotation,<br>pathogen induced gene   | CCTTACACCCACGAATGAT<br>CGGACAGAGAGGAGACAAGG  | 388 | 63.5; 0'30"  | -             | B9: 388<br>D: Null                                                                 | G25-64          |
| <i>uhw285</i> | Genetic, co-<br>dominant, CAPS | 454, Geneious annotation,<br>heat shock induced gene | GCTGGAGGAGGAGGGAGAG<br>GCTTCTCCAGCTGCTTCACT  | 632 | 65/55; 0'30" | <i>Acil</i>   | B9: 228, 114, 114,<br>57, 46, 40, 33<br>D447: 195, 114, 114,<br>57, 46, 40, 33, 33 | G25-64          |
| <i>uhw286</i> | Genetic, co-<br>dominant, CAPS | 454, ISBP Finder TE<br>junction <sup>7</sup>         | CGGCAGTGGACTTCGTTACT<br>TTGCTGTCCCAAATTCATCA | 194 | 65/55; 0'30" | <i>Taal</i>   | B9: 162, 32<br>D447: 86, 76, 32                                                    | G25-64          |
| <i>uhw281</i> | Genetic, co-<br>dominant, CAPS | 454, BlastX, Protein<br>AAM45953                     | GGCAGCCCAATACAGTTGTT<br>TTTTGCCGAATCAGAACTCC | 243 | 65/55; 0'30" | <i>Xcel</i>   | B9: 244<br>D447: 140, 102                                                          | G25-64          |
| <i>uhw279</i> | Physical                       | 454, BlastX, Protein<br>EMS57035                     | TTCACTCACGACAACCTACCG<br>GGCCACCTCATCGCTGTC  | 399 | 65/55; 0'30" | -             | B9: 399<br>D447: Null                                                              | TaaCsp1BS079P23 |
| <i>uhw277</i> | Genetic, co-<br>dominant, CAPS | 454, BlastX, Protein<br>AAP74646                     | GGGCTGTAGTCGCCTGTGTA<br>GGATATGCTGACGAGCCTTC | 307 | 65/55; 0'20" | <i>DraIII</i> | B9: 176, 131<br>D447: 307                                                          | TaaCsp1BS079P23 |
| <i>uhw268</i> | Genetic B9<br>dominant         | BES Sanger, BlastN ESTs<br>CD875071, CJ939425        | AGGGCATCCAGGAATTTCA<br>AGCTGTAGTGCGACCTGGAG  | 994 | 60; 0'50"    | -             | B9: 994<br>D447: Null                                                              | TaaCsp729H14    |

\*PCR annealing temperature (range is provided for touchdown) and the elongation time.

†Overlaps of CS 1BS BAC clones are presented in Supplementary Fig. 3d.

### Supplementary Table 6. Molecular markers developed from the sequences of G25 BAC clone G25-141 and the Zavitan 1BS pseudomolecule.

| Marker Name   | Marker Type          | Primer F sequence     | Primer R sequence    | Length |
|---------------|----------------------|-----------------------|----------------------|--------|
| <i>uhw300</i> | Genetic, B9 dominant | CCGTGTCAGCCACCTACAAT  | GCACTCTACCACCGAACACA | 863 bp |
| <i>uhw301</i> | Genetic, B9 dominant | GTAGTGGCTCGTTCCGGTGAT | TTTCGCATCCCACCCTACTG | 936 bp |
| <i>uhw302</i> | Genetic, B9 dominant | CATCCATTCTCCGACAAGT   | CACTGCAATGCAAAAATGCT | 216 bp |



**Supplementary Table 7. Molecular characterization of the *WTK1* EMS mutants.**

| Mutant No. | Protein domain in <i>WTK1</i> | Line ID                       | Base substitution* | Effect on amino acid† | SIFT§       | Ploidy | Susceptible reaction to <i>Pst</i> inoculation‡                                       |
|------------|-------------------------------|-------------------------------|--------------------|-----------------------|-------------|--------|---------------------------------------------------------------------------------------|
| EMS1       | KinI                          | Suncea+ <i>yr15</i> -L18      | G 160 A            | G 54 S                | <b>0.00</b> | 6X     | 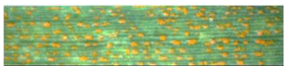   |
| EMS2       | KinI                          | Suncea+ <i>yr15</i> -L89      | G 340 A            | E 114 K               | <b>0.02</b> | 6X     |    |
| EMS3       | KinI                          | B9+ <i>yr15</i> -L1351        | G 448 A            | E 150 K               | 0.87        | 4X     |    |
| EMS4       | KinI                          | Avocet+ <i>yr15</i> -1        | C 482 T            | P 161 L               | <b>0.00</b> | 6X     |    |
| EMS5       | KinI                          | Avocet+ <i>yr15</i> -L90      | C 632 T            | P 211 L               | <b>0.00</b> | 6X     |    |
| EMS6       | KinII                         | Avocet+ <i>yr15</i> -13       | G 2922 A           | A 460 T               | <b>0.00</b> | 6X     |    |
| EMS7       | KinII                         | Excalibur+ <i>yr15</i> -6L306 | G 3114 A           | D 524 N               | 0.33        | 6X     |    |
| EMS8       | KinII                         | Avocet+ <i>yr15</i> -L72      | C 3229 T           | T 562 I               | <b>0.00</b> | 6X     |    |
| EMS9       | KinII                         | B9+ <i>yr15</i> -LF           | C 3315 T           | P 591 S               | 0.85        | 4X     |   |
| EMS10      | KinII                         | Excalibur+ <i>yr15</i> -L137  | G 3469 A           | V 614 M               | 0.14        | 6X     |  |

\*The first letter indicates the wild-type nucleotide, the number indicates its position relative to the ATG start codon, and the last letter shows the mutant nucleotide. The complete *WTK1* coding regions of the above 10 mutants were sequenced; no additional mutations were detected.

†The first letter indicates the wild-type amino acid, the number indicates its position relative to the start methionine, and the last letter shows the mutant amino acid.

‡Yellow rust severity was evaluated at 14-18 dpi with *Pst* isolate #5006.

§The *WTK1* mutations were ranked using the SIFT program. Low SIFT scores (<0.05) predict mutations with severe effects on protein function.

**Supplementary Table 8. Segregation ratio of resistance and susceptible phenotypes in F<sub>2</sub> families of EMS mutagenized lines carrying the *yr15* susceptible allele crossed with wild type Avocet+*Yr15* measured after inoculation with *Pst* isolate #5006.**

| Cross                    | F <sub>2</sub> |             | Postulated ratio | $\chi^2$ value | P-value* |
|--------------------------|----------------|-------------|------------------|----------------|----------|
|                          | Resistant      | Susceptible |                  |                |          |
| EMS4/Avocet+ <i>Yr15</i> | 82             | 24          | 3:1              | 0.31           | 0.29     |
| EMS6/Avocet+ <i>Yr15</i> | 77             | 28          | 3:1              | 0.16           | 0.35     |

\*P-value for a one-tail test of significance by  $\chi^2$  statistics with *df*=1

**Supplementary Table 9. PCR primers used for the functional characterization of *WTK1*.**

|                                     | <b>Function</b>     | <b>Primer name</b>       | <b>Primer sequence</b>                                         |
|-------------------------------------|---------------------|--------------------------|----------------------------------------------------------------|
| <b>Transgenics</b>                  |                     | Yr15F1                   | CACCTCGAGCGAGGTGGTCCAGTAGTT                                    |
|                                     |                     | Yr15R1                   | CTAAGGAGACTACAGACCTAACAT                                       |
|                                     |                     | Yr15F2                   | CACCCAGTAGGGTGGGATGCGAAATA                                     |
|                                     |                     | Yr15R2                   | CTTTACCTAGGTTCTCTCCATCCAACCAAT                                 |
|                                     |                     | HpyF1                    | GGCCTCCAGAAGAAGATGTTGG                                         |
|                                     |                     | HpyR1                    | GAGCTGACCTATTGCATCTCC                                          |
|                                     |                     | Yr15TestF1               | TGGGTCGAAGGAAACAAATA                                           |
|                                     |                     | Yr15TestR1               | AACAGCACTGCGATGGTAATA                                          |
|                                     |                     | Y15K1_F2                 | GGAGATAGAGCACATTACAGAC                                         |
|                                     |                     | uhw301R                  | TTTCGCATCCCACCCTACTG                                           |
| <b>Transcription</b>                | qRT-PCR             | Ubiquitin_F              | TTGACAACGTGAAGGCGAAG                                           |
|                                     |                     | Ubiquitin_R              | GGCAAAGATGAGACGCTGCT                                           |
|                                     | qRT-PCR             | Isoform1_F               | GAAATTGATTTGAAGATTGAAGCA                                       |
|                                     |                     | Isoform1_R               | CATATTTGTTTCCTTCGACCCAA                                        |
|                                     | qRT-PCR             | Isoform2_F               | GTGGCAATGCAGATGGTCCT                                           |
|                                     |                     | Isoform2_R               | TTGAGAAGACTTGATGGCGATGTC                                       |
|                                     | qRT-PCR             | Isoform3_F               | TCCGACAATGGTTGAGGTAGC                                          |
|                                     |                     | Isoform3_R               | GCAACAATTGCCTTCCTGTTC                                          |
|                                     | Full-length<br>cDNA | WTK1_L2F                 | CTGCTGCTACCTGTTCTGTAA                                          |
|                                     |                     | WTK1_RE6                 | ACAGACAGTGACACGGACAT                                           |
|                                     |                     | E1820                    | AAGCAGTGGTAACAACGCAGAGTACTTTTTTTTTTTTTT<br>TTTTTTTTTTTTTTTTTNA |
|                                     |                     | E2146                    | AAGCAGTGGTAACAACGCAGAGTAC                                      |
|                                     |                     | Y15F0                    | CAGGCAGGCTGCTGCTAC                                             |
|                                     |                     | Y15F2                    | GTCTTCATATGCTGCTTGCAC                                          |
|                                     |                     | RNAoligo                 | GCUGAUGGCGAUGAAUGAACACUG                                       |
|                                     | 5'RACE              | GCTGATGGCGATGAATGAACACTG |                                                                |
|                                     | Y15R2               | TGCTTCCGCTGACTCGATGGC    |                                                                |
|                                     | Y15R1               | TGCAGCAGCCTAACAATCTG     |                                                                |
| <b>Subcellular<br/>localization</b> |                     | attB4F35S                | GGGACAACCTTTGTATAGAAAAGTTGAGATTAGCCTT<br>TTCAATTTTCAG          |
|                                     |                     | attB1R35S                | GGGACTGCTTTTTTTGTACAAACTTGCGTGTCTCTCC<br>AAATGAAATG            |
|                                     |                     | attB1FKinase             | GGGACAAGTTTGTACAAAAAAGCAGGCTCCRCCATG<br>GATTACCAAGG            |
|                                     |                     | attB2Rkinase             | GGGACCACCTTTGTACAAGAAAGCTGGGTGGTTGATG<br>CCTGTAGAGC            |
|                                     |                     | attB2FGFPnos             | GGGACAGCTTCTTGTACAAAGTGGGCATGGTGAGC<br>AAGGGCGAGGAGC           |
|                                     |                     | attB3RGFPnos             | GGGACAACCTTTGTATAATAAAGTTGCATCTAGAGGG<br>CCCGGATCTG            |
|                                     |                     | attB1Freg                | GGGACAAGTTTGTACAAAAAAGCAGGCTCCRCCATG<br>AAGAACTAACAAG          |
|                                     |                     | attB2Ryr15               | GGGACCACCTTTGTACAAGAAAGCTGGGTGCTTTTGC<br>ACAATTGCCTC           |
| <b>EMS mutant<br/>screen</b>        |                     | WJKDF1                   | GCTGCTGCTACCTGTTCTGT                                           |
|                                     |                     | WJKDR1                   | CCCTACCTAATATCCGCGTGC                                          |
|                                     |                     | WJKDF2                   | TCCAATCCTTGTGTGCTACC                                           |
|                                     |                     | WJKDR2                   | TTGCCAGGATTCACCACTA                                            |
|                                     |                     | WJKDF3                   | GCTGCTGGAGCTTTTAACCG                                           |
|                                     |                     | WJKDR3                   | GCGAGAGAACGATTTCCCCT                                           |
|                                     |                     |                          |                                                                |
| <b>Germplasm<br/>screen</b>         | KinI                | Y15K1_F2                 | GGAGATAGAGCACATTACAGAC                                         |
|                                     |                     | uhw301R                  | TTTCGCATCCCACCCTACTG                                           |
|                                     | KinII               | W_2F                     | TGCACGCGGATATTAGGTAGG                                          |
| W_2R                                |                     | TGATGAAGAGGACCAACGCA     |                                                                |

**Supplementary Table 10. DIC accessions evaluated for the presence of *Wtk1*.** Each accession was evaluated with a set of two diagnostic markers designed to amplify the two conserved domains of *Wtk1* (Supplementary Table 9).

| Wheat                                | No. | <i>Wtk1</i> | Accession number*                                                                                                                                                                                                                                                                                                                                                                                                                                                                                                                                                                                                                                                                                                                                                                                                                                                                                                                                                                                                                                                                                                                                                                                                                                                                                                                                           |
|--------------------------------------|-----|-------------|-------------------------------------------------------------------------------------------------------------------------------------------------------------------------------------------------------------------------------------------------------------------------------------------------------------------------------------------------------------------------------------------------------------------------------------------------------------------------------------------------------------------------------------------------------------------------------------------------------------------------------------------------------------------------------------------------------------------------------------------------------------------------------------------------------------------------------------------------------------------------------------------------------------------------------------------------------------------------------------------------------------------------------------------------------------------------------------------------------------------------------------------------------------------------------------------------------------------------------------------------------------------------------------------------------------------------------------------------------------|
| DIC southern population <sup>†</sup> | 29  | +           | TD103986, TD104084, TD104266, TD104326, TD104422, TD104424, TD104430, TD104432, TD104447, TD104668, TD104732, TD104733, TD104785, PI233288, PI428100, PI428126, PI428127, PI428132, PI428135, PI428143, PI466991, PI503314, PI538690, PI538700, PI503316, IG46526, IG46504, CGN19932, CGN21078                                                                                                                                                                                                                                                                                                                                                                                                                                                                                                                                                                                                                                                                                                                                                                                                                                                                                                                                                                                                                                                              |
|                                      | 133 | -           | TD103984, TD103989, TD104006, TD104015, TD104019, TD104020, TD104541, TD104542, TD104064, TD104068, TD104069, TD104073, TD104088, TD104089, TD104093, TD104134, TD104136, TD104139, TD104140, TD104144, TD104552, TD104555, TD104157, TD104159, TD104168, TD104172, TD104173, TD104177, TD104183, TD104191, TD104205, TD104213, TD104214, TD104559, TD104247, TD104249, TD104253, TD104255, TD104257, TD104261, TD104263, TD104268, TD104279, TD104290, TD104293, TD104294, TD104302, TD104306, TD104336, TD104375, TD104397, TD104404, TD104409, TD104413, TD104425, TD104429, TD104434, TD104446, TD104449, TD104453, TD104455, TD104463, TD104465, TD104466, TD104467, TD104469, TD104470, TD104531, TD104597, TD104599, TD104600, TD104619, TD104621, TD104628, TD104684, TD104727, TD104742, TD104751, TD104755, TD104757, TD104764, TD104766, TD104767, TD104768, TD104774, PI414719, PI414720, PI414721, PI414722, PI428014, PI428093, PI428097, PI428099, PI428105, PI428119, PI466949, PI466955, PI466981, PI467004, PI471016, PI471035, PI487253, PI487255, PI503312, PI503315, PI538680, PI538684, PI538685, PI538699, PI538719, IG46439, IG46457, IG46473, IG46466, IG46492, IG46476, IG45490, IG45493, IG45494, IG45500, IG45502, IG45676, IG45726, IG45964, IG46320, IG46323, IG46324, IG46352, IG46386, IG46397, IG46420, IG110737, IG110815 |
| DIC northern population <sup>‡</sup> | 19  | -           | PI428017, PI428018, PI428053, PI428054, PI428069, PI428077, PI428092, PI538626, PI538633, PI538651, PI538656, PI538657, PI554580, PI554582, PI554583, PI503310, PI428016, IG116173, IG116184                                                                                                                                                                                                                                                                                                                                                                                                                                                                                                                                                                                                                                                                                                                                                                                                                                                                                                                                                                                                                                                                                                                                                                |

\*DIC accessions were obtained from the National Small Grains collection (NSGC, USDA; PI numbers), the Wild Cereal Gene Bank (ICGB; Institute of Evolution, University of Haifa; TD numbers)<sup>8</sup>, the International Center for Agricultural Research in Dry Areas (ICARDA; Rabat, Morocco; IG numbers), the Center for Genetic Resources (CGN; Wageningen University & Research; CGN numbers).

<sup>†</sup>Wild emmer wheat originating from Israel, Lebanon, Jordan, or Syria<sup>9</sup>.

<sup>‡</sup>Wild emmer wheat originating from Turkey or Iran<sup>9</sup>.



**Supplementary Table 11. *Triticum* and *Aegilops* species evaluated for the presence of *Wtk1*.** Each accession was screened by PCR for the KinI and KinII regions of *Wtk1* with gene-specific diagnostic markers (Supplementary Table 9).

| Germplasm<br>number/variety<br>number | genus           | species         | subspecies        | KinI | KinII |
|---------------------------------------|-----------------|-----------------|-------------------|------|-------|
| CGN4219                               | <i>Triticum</i> | <i>turgidum</i> | <i>dicoccum</i>   | -    | -     |
| CGN6542                               | <i>Triticum</i> | <i>turgidum</i> | <i>dicoccum</i>   | -    | -     |
| CGN6543                               | <i>Triticum</i> | <i>turgidum</i> | <i>dicoccum</i>   | -    | -     |
| CGN7965                               | <i>Triticum</i> | <i>turgidum</i> | <i>dicoccum</i>   | -    | -     |
| CGN7966                               | <i>Triticum</i> | <i>turgidum</i> | <i>dicoccum</i>   | -    | -     |
| CGN7975                               | <i>Triticum</i> | <i>turgidum</i> | <i>dicoccum</i>   | -    | -     |
| CGN8031                               | <i>Triticum</i> | <i>turgidum</i> | <i>dicoccum</i>   | -    | -     |
| CGN8104                               | <i>Triticum</i> | <i>turgidum</i> | <i>dicoccum</i>   | -    | -     |
| CGN8344                               | <i>Triticum</i> | <i>turgidum</i> | <i>dicoccum</i>   | -    | -     |
| CGN8345                               | <i>Triticum</i> | <i>turgidum</i> | <i>dicoccum</i>   | -    | -     |
| CGN8348                               | <i>Triticum</i> | <i>turgidum</i> | <i>dicoccum</i>   | -    | -     |
| CGN8350                               | <i>Triticum</i> | <i>turgidum</i> | <i>dicoccum</i>   | -    | -     |
| CGN8356                               | <i>Triticum</i> | <i>turgidum</i> | <i>dicoccum</i>   | -    | -     |
| CGN8362                               | <i>Triticum</i> | <i>turgidum</i> | <i>dicoccum</i>   | -    | -     |
| CGN10424                              | <i>Triticum</i> | <i>turgidum</i> | <i>dicoccum</i>   | -    | -     |
| CGN10425                              | <i>Triticum</i> | <i>turgidum</i> | <i>dicoccum</i>   | -    | -     |
| CGN11482                              | <i>Triticum</i> | <i>turgidum</i> | <i>dicoccum</i>   | -    | -     |
| CGN11486                              | <i>Triticum</i> | <i>turgidum</i> | <i>dicoccum</i>   | -    | -     |
| CGN12275                              | <i>Triticum</i> | <i>turgidum</i> | <i>dicoccum</i>   | -    | -     |
| CGN12278                              | <i>Triticum</i> | <i>turgidum</i> | <i>dicoccum</i>   | -    | -     |
| CGN16105                              | <i>Triticum</i> | <i>turgidum</i> | <i>dicoccum</i>   | -    | -     |
| CGN21064                              | <i>Triticum</i> | <i>turgidum</i> | <i>dicoccum</i>   | -    | -     |
| CGN21069                              | <i>Triticum</i> | <i>turgidum</i> | <i>dicoccum</i>   | -    | -     |
| CGN12283                              | <i>Triticum</i> | <i>turgidum</i> | <i>dicoccum</i>   | -    | -     |
| CGN13154                              | <i>Triticum</i> | <i>turgidum</i> | <i>dicoccum</i>   | -    | -     |
| PI532302                              | <i>Triticum</i> | <i>turgidum</i> | <i>dicoccum</i>   | -    | -     |
| PI319868                              | <i>Triticum</i> | <i>turgidum</i> | <i>dicoccum</i>   | -    | -     |
| PI319869                              | <i>Triticum</i> | <i>turgidum</i> | <i>dicoccum</i>   | -    | -     |
| PI355454                              | <i>Triticum</i> | <i>turgidum</i> | <i>dicoccum</i>   | -    | -     |
| PI355496                              | <i>Triticum</i> | <i>turgidum</i> | <i>dicoccum</i>   | -    | -     |
| PI352357                              | <i>Triticum</i> | <i>turgidum</i> | <i>dicoccum</i>   | -    | -     |
| PI352348                              | <i>Triticum</i> | <i>turgidum</i> | <i>dicoccum</i>   | -    | -     |
| PI352367                              | <i>Triticum</i> | <i>turgidum</i> | <i>dicoccum</i>   | -    | -     |
| PI352352                              | <i>Triticum</i> | <i>turgidum</i> | <i>dicoccum</i>   | -    | -     |
| PI182743                              | <i>Triticum</i> | <i>turgidum</i> | <i>dicoccum</i>   | -    | -     |
| PI352361                              | <i>Triticum</i> | <i>turgidum</i> | <i>dicoccum</i>   | -    | -     |
| PI191091                              | <i>Triticum</i> | <i>turgidum</i> | <i>dicoccum</i>   | -    | -     |
| PI276007                              | <i>Triticum</i> | <i>turgidum</i> | <i>dicoccum</i>   | -    | -     |
| PI606325                              | <i>Triticum</i> | <i>turgidum</i> | <i>dicoccum</i>   | -    | -     |
| PI352329                              | <i>Triticum</i> | <i>turgidum</i> | <i>dicoccum</i>   | -    | -     |
| PI94741                               | <i>Triticum</i> | <i>turgidum</i> | <i>dicoccum</i>   | -    | -     |
| PI377658                              | <i>Triticum</i> | <i>turgidum</i> | <i>dicoccum</i>   | -    | -     |
| PI264964                              | <i>Triticum</i> | <i>turgidum</i> | <i>dicoccum</i>   | -    | -     |
| PI470739                              | <i>Triticum</i> | <i>turgidum</i> | <i>dicoccum</i>   | -    | -     |
| PI94661                               | <i>Triticum</i> | <i>turgidum</i> | <i>dicoccum</i>   | -    | -     |
| PI470737                              | <i>Triticum</i> | <i>turgidum</i> | <i>dicoccum</i>   | -    | -     |
| PI326312                              | <i>Triticum</i> | <i>turgidum</i> | <i>dicoccum</i>   | -    | -     |
| PI94640                               | <i>Triticum</i> | <i>turgidum</i> | <i>dicoccum</i>   | -    | -     |
| CGN4222                               | <i>Triticum</i> | <i>turgidum</i> | <i>carthlicum</i> | -    | -     |
| CGN6596                               | <i>Triticum</i> | <i>turgidum</i> | <i>carthlicum</i> | -    | -     |
| CGN8389                               | <i>Triticum</i> | <i>turgidum</i> | <i>polonicum</i>  | -    | -     |
| CGN8391                               | <i>Triticum</i> | <i>turgidum</i> | <i>polonicum</i>  | -    | -     |
| CGN12289                              | <i>Triticum</i> | <i>turgidum</i> | <i>polonicum</i>  | -    | -     |
| CGN12291                              | <i>Triticum</i> | <i>turgidum</i> | <i>polonicum</i>  | -    | -     |

|          |                 |                     |                    |   |   |
|----------|-----------------|---------------------|--------------------|---|---|
| CGN12293 | <i>Triticum</i> | <i>turgidum</i>     | <i>polonicum</i>   | - | - |
| CGN4224  | <i>Triticum</i> | <i>monococcum</i>   |                    | - | - |
| CGN6598  | <i>Triticum</i> | <i>monococcum</i>   |                    | + | - |
| CGN6602  | <i>Triticum</i> | <i>monococcum</i>   |                    | + | - |
| CGN9956  | <i>Triticum</i> | <i>monococcum</i>   |                    | - | - |
| CGN10500 | <i>Triticum</i> | <i>monococcum</i>   |                    | - | - |
| CGN10682 | <i>Triticum</i> | <i>speltoides</i>   |                    | - | - |
| CGN10684 | <i>Triticum</i> | <i>speltoides</i>   |                    | - | - |
| CGN10686 | <i>Triticum</i> | <i>speltoides</i>   |                    | - | - |
| CGN10687 | <i>Triticum</i> | <i>speltoides</i>   |                    | - | - |
| CGN10692 | <i>Triticum</i> | <i>speltoides</i>   |                    | + | - |
| CGN10697 | <i>Triticum</i> | <i>speltoides</i>   |                    | - | - |
| CGN10698 | <i>Triticum</i> | <i>speltoides</i>   |                    | - | - |
| CGN10671 | <i>Triticum</i> | <i>speltoides</i>   | <i>speltoides</i>  | - | - |
| CGN10673 | <i>Triticum</i> | <i>bicorne</i>      |                    | - | - |
| CGN10672 | <i>Triticum</i> | <i>bicorne</i>      |                    | - | - |
| CGN6525  | <i>Triticum</i> | <i>triunciale</i>   |                    | + | - |
| CGN6604  | <i>Triticum</i> | <i>triunciale</i>   |                    | + | - |
| CGN10660 | <i>Triticum</i> | <i>triunciale</i>   |                    | + | - |
| CGN8408  | <i>Triticum</i> | <i>timopheevii</i>  | <i>timopheevii</i> | - | - |
| CGN10495 | <i>Triticum</i> | <i>timopheevii</i>  | <i>timopheevii</i> | - | - |
| CGN10497 | <i>Triticum</i> | <i>timopheevii</i>  | <i>timopheevii</i> | - | - |
| CGN10677 | <i>Triticum</i> | <i>longissimum</i>  | <i>longissima</i>  | - | - |
| CGN10681 | <i>Triticum</i> | <i>longissimum</i>  | <i>longissima</i>  | - | - |
| CGN10777 | <i>Triticum</i> | <i>longissimum</i>  | <i>sharonensis</i> | - | - |
| CGN16088 | <i>Triticum</i> | <i>longissimum</i>  | <i>sharonensis</i> | - | - |
| CGN13124 | <i>Triticum</i> | <i>longissimum</i>  | <i>sharonensis</i> | - | - |
| CGN13111 | <i>Triticum</i> | <i>longissimum</i>  |                    | - | - |
| CGN16014 | <i>Triticum</i> | <i>longissimum</i>  |                    | - | - |
| CGN13113 | <i>Triticum</i> | <i>squarrosus</i>   |                    | - | - |
| CGN10734 | <i>Triticum</i> | <i>squarrosus</i>   |                    | - | - |
| CGN16008 | <i>Triticum</i> | <i>squarrosus</i>   |                    | - | - |
| CGN13119 | <i>Triticum</i> | <i>squarrosus</i>   |                    | - | - |
| CGN13116 | <i>Triticum</i> | <i>cylindricum</i>  |                    | - | - |
| CGN13117 | <i>Triticum</i> | <i>cylindricum</i>  |                    | - | - |
| CGN10704 | <i>Triticum</i> | <i>crassum</i>      |                    | + | - |
| CGN10706 | <i>Triticum</i> | <i>crassum</i>      |                    | + | - |
| CGN10707 | <i>Triticum</i> | <i>ventricosum</i>  |                    | - | - |
| CGN10712 | <i>Triticum</i> | <i>ventricosum</i>  |                    | - | - |
| CGN6613  | <i>Triticum</i> | <i>ovatum</i>       |                    | + | - |
| CGN10668 | <i>Triticum</i> | <i>ovatum</i>       |                    | + | - |
| CGN10664 | <i>Triticum</i> | <i>triaristatum</i> |                    | + | - |
| CGN21070 | <i>Triticum</i> | <i>triaristatum</i> |                    | + | - |
| CGN10774 | <i>Triticum</i> | <i>triunciale</i>   |                    | - | - |
| CGN6606  | <i>Triticum</i> | <i>kotschyi</i>     |                    | + | - |
| CGN6607  | <i>Triticum</i> | <i>columnare</i>    |                    | + | - |
| CGN6077  | <i>Triticum</i> | <i>ventricosum</i>  |                    | - | - |
| CGN16015 | <i>Triticum</i> | <i>lorentii</i>     |                    | + | - |
| CGN16016 | <i>Triticum</i> | <i>caudatum</i>     |                    | - | - |
| CGN16017 | <i>Triticum</i> | <i>peregrinum</i>   |                    | + | - |
| PI542175 | <i>Aegilops</i> | <i>comosa</i>       |                    | - | - |
| PI551036 | <i>Aegilops</i> | <i>comosa</i>       |                    | - | - |
| PI551038 | <i>Aegilops</i> | <i>comosa</i>       |                    | - | - |
| PI551034 | <i>Aegilops</i> | <i>comosa</i>       |                    | - | - |
| PI551032 | <i>Aegilops</i> | <i>comosa</i>       |                    | - | - |
| PI551020 | <i>Aegilops</i> | <i>comosa</i>       |                    | - | - |
| PI551080 | <i>Aegilops</i> | <i>comosa</i>       |                    | - | - |
| PI551031 | <i>Aegilops</i> | <i>comosa</i>       |                    | - | - |
| PI276970 | <i>Aegilops</i> | <i>comosa</i>       |                    | - | - |
| PI551047 | <i>Aegilops</i> | <i>comosa</i>       |                    | - | - |

**Supplementary Table 12. Durum and common wheat accessions evaluated for the presence of *Wtk1* and for resistance to *Pst*.** Each accession was categorized with gene-specific diagnostic markers for the presence of the two conserved domains (Supplementary Table 9).

| Germplasm number/variety number | genus           | species         | subspecies   | KinI<br><i>Wtk1</i> | KinII<br><i>Wtk1</i> | Phenotype <sup>‡</sup> |
|---------------------------------|-----------------|-----------------|--------------|---------------------|----------------------|------------------------|
| 280-1*                          | <i>Triticum</i> | <i>turgidum</i> | <i>durum</i> | +                   | +                    | R                      |
| 280-2*                          | <i>Triticum</i> | <i>turgidum</i> | <i>durum</i> | +                   | +                    | R                      |
| Aristan <sup>†</sup>            | <i>Triticum</i> | <i>turgidum</i> | <i>durum</i> | -                   | -                    | NT                     |
| Aziziah <sup>†</sup>            | <i>Triticum</i> | <i>turgidum</i> | <i>durum</i> | -                   | -                    | NT                     |
| B10*                            | <i>Triticum</i> | <i>turgidum</i> | <i>durum</i> | +                   | +                    | R                      |
| B1*                             | <i>Triticum</i> | <i>turgidum</i> | <i>durum</i> | +                   | +                    | R                      |
| B2*                             | <i>Triticum</i> | <i>turgidum</i> | <i>durum</i> | +                   | +                    | R                      |
| B70*                            | <i>Triticum</i> | <i>turgidum</i> | <i>durum</i> | +                   | +                    | R                      |
| B9*                             | <i>Triticum</i> | <i>turgidum</i> | <i>durum</i> | +                   | +                    | R                      |
| Baio <sup>†</sup>               | <i>Triticum</i> | <i>turgidum</i> | <i>durum</i> | -                   | -                    | NT                     |
| Bufala <sup>†</sup>             | <i>Triticum</i> | <i>turgidum</i> | <i>durum</i> | -                   | -                    | NT                     |
| Capeiti8 <sup>†</sup>           | <i>Triticum</i> | <i>turgidum</i> | <i>durum</i> | -                   | -                    | NT                     |
| Cappelli <sup>†</sup>           | <i>Triticum</i> | <i>turgidum</i> | <i>durum</i> | -                   | -                    | NT                     |
| D447                            | <i>Triticum</i> | <i>turgidum</i> | <i>durum</i> | -                   | -                    | S                      |
| Duilio <sup>†</sup>             | <i>Triticum</i> | <i>turgidum</i> | <i>durum</i> | -                   | -                    | NT                     |
| Kronos                          | <i>Triticum</i> | <i>turgidum</i> | <i>durum</i> | -                   | -                    | S                      |
| Langdon                         | <i>Triticum</i> | <i>turgidum</i> | <i>durum</i> | -                   | -                    | S                      |
| Muri S 50 3 <sup>†</sup>        | <i>Triticum</i> | <i>turgidum</i> | <i>durum</i> | -                   | -                    | NT                     |
| Nursit 163                      | <i>Triticum</i> | <i>turgidum</i> | <i>durum</i> | -                   | -                    | S                      |
| Ofanto <sup>†</sup>             | <i>Triticum</i> | <i>turgidum</i> | <i>durum</i> | -                   | -                    | NT                     |
| Pavone <sup>†</sup>             | <i>Triticum</i> | <i>turgidum</i> | <i>durum</i> | -                   | -                    | NT                     |
| Razzak <sup>†</sup>             | <i>Triticum</i> | <i>turgidum</i> | <i>durum</i> | -                   | -                    | NT                     |
| Roqueno <sup>†</sup>            | <i>Triticum</i> | <i>turgidum</i> | <i>durum</i> | -                   | -                    | NT                     |
| Russello <sup>†</sup>           | <i>Triticum</i> | <i>turgidum</i> | <i>durum</i> | -                   | -                    | NT                     |
| Sabil 1 <sup>†</sup>            | <i>Triticum</i> | <i>turgidum</i> | <i>durum</i> | -                   | -                    | NT                     |
| Santa <sup>†</sup>              | <i>Triticum</i> | <i>turgidum</i> | <i>durum</i> | -                   | -                    | NT                     |
| Simeto <sup>†</sup>             | <i>Triticum</i> | <i>turgidum</i> | <i>durum</i> | -                   | -                    | NT                     |
| Siyah Kilakli <sup>†</sup>      | <i>Triticum</i> | <i>turgidum</i> | <i>durum</i> | -                   | -                    | NT                     |
| Svevo                           | <i>Triticum</i> | <i>turgidum</i> | <i>durum</i> | -                   | -                    | S                      |
| Taganrog <sup>†</sup>           | <i>Triticum</i> | <i>turgidum</i> | <i>durum</i> | -                   | -                    | NT                     |
| Timilia <sup>†</sup>            | <i>Triticum</i> | <i>turgidum</i> | <i>durum</i> | -                   | -                    | NT                     |
| Triminia <sup>†</sup>           | <i>Triticum</i> | <i>turgidum</i> | <i>durum</i> | -                   | -                    | NT                     |
| Tripolino <sup>†</sup>          | <i>Triticum</i> | <i>turgidum</i> | <i>durum</i> | -                   | -                    | NT                     |
| Vatan <sup>†</sup>              | <i>Triticum</i> | <i>turgidum</i> | <i>durum</i> | -                   | -                    | NT                     |
| Villemur <sup>†</sup>           | <i>Triticum</i> | <i>turgidum</i> | <i>durum</i> | -                   | -                    | NT                     |
| Waha <sup>†</sup>               | <i>Triticum</i> | <i>turgidum</i> | <i>durum</i> | -                   | -                    | NT                     |
| Avocet S                        | <i>Triticum</i> | <i>aestivum</i> |              | -                   | -                    | S                      |
| Avocet+ <i>Yr15</i> *           | <i>Triticum</i> | <i>aestivum</i> |              | +                   | +                    | R                      |
| BarNear                         | <i>Triticum</i> | <i>aestivum</i> |              | -                   | -                    | S                      |
| Baxter                          | <i>Triticum</i> | <i>aestivum</i> |              | -                   | -                    | S                      |
| Bobwhite                        | <i>Triticum</i> | <i>aestivum</i> |              | -                   | -                    | S                      |
| Bobwhite+ <i>Yr15</i> *         | <i>Triticum</i> | <i>aestivum</i> |              | +                   | +                    | R                      |
| Chinese Spring                  | <i>Triticum</i> | <i>aestivum</i> |              | -                   | -                    | S                      |
| Combat                          | <i>Triticum</i> | <i>aestivum</i> |              | -                   | -                    | S                      |
| Corrigin                        | <i>Triticum</i> | <i>aestivum</i> |              | -                   | -                    | S                      |
| Corrigin+ <i>Yr15</i> *         | <i>Triticum</i> | <i>aestivum</i> |              | +                   | +                    | R                      |
| Excalibur                       | <i>Triticum</i> | <i>aestivum</i> |              | -                   | -                    | S                      |
| Excalibur+ <i>Yr15</i> *        | <i>Triticum</i> | <i>aestivum</i> |              | +                   | +                    | R                      |
| Fielder                         | <i>Triticum</i> | <i>aestivum</i> |              | -                   | -                    | S                      |

|                |                          |   |   |   |
|----------------|--------------------------|---|---|---|
| Galil          | <i>Triticum aestivum</i> | - | - | S |
| Gedera         | <i>Triticum aestivum</i> | - | - | S |
| HSB 2408*      | <i>Triticum aestivum</i> | + | + | R |
| HSB 2527       | <i>Triticum aestivum</i> | - | - | S |
| HSB 2944*      | <i>Triticum aestivum</i> | + | + | R |
| HSB 2949*      | <i>Triticum aestivum</i> | + | + | R |
| HSB 3177*      | <i>Triticum aestivum</i> | + | + | R |
| Kulin          | <i>Triticum aestivum</i> | - | - | S |
| Kunlin+Yr15*   | <i>Triticum aestivum</i> | + | + | R |
| Merav          | <i>Triticum aestivum</i> | - | - | S |
| Mexico708      | <i>Triticum aestivum</i> | - | - | S |
| Ruby           | <i>Triticum aestivum</i> | - | - | S |
| Ruta           | <i>Triticum aestivum</i> | - | - | S |
| Sapphire       | <i>Triticum aestivum</i> | - | - | S |
| Sel07-97*      | <i>Triticum aestivum</i> | + | + | R |
| Sel20*         | <i>Triticum aestivum</i> | + | + | R |
| Sel32*         | <i>Triticum aestivum</i> | + | + | R |
| Sel4*          | <i>Triticum aestivum</i> | + | + | R |
| Sel46*         | <i>Triticum aestivum</i> | + | + | R |
| Sel7*          | <i>Triticum aestivum</i> | + | + | R |
| Shenton        | <i>Triticum aestivum</i> | - | - | S |
| Stilieto       | <i>Triticum aestivum</i> | - | - | S |
| Stilieto+Yr15* | <i>Triticum aestivum</i> | + | + | R |
| Suncea         | <i>Triticum aestivum</i> | - | - | S |
| Suncea+Yr15*   | <i>Triticum aestivum</i> | + | + | R |
| UC1037         | <i>Triticum aestivum</i> | - | - | S |
| UC1037+Yr15*   | <i>Triticum aestivum</i> | + | + | R |
| UC1041         | <i>Triticum aestivum</i> | - | - | S |
| UC1041+Yr15*   | <i>Triticum aestivum</i> | + | + | R |
| UC1107         | <i>Triticum aestivum</i> | - | - | S |
| UC1107+Yr15*   | <i>Triticum aestivum</i> | + | + | R |
| UC1110         | <i>Triticum aestivum</i> | - | - | S |
| UC1110+Yr15*   | <i>Triticum aestivum</i> | + | + | R |
| UC1128         | <i>Triticum aestivum</i> | - | - | S |
| UC1128+Yr15*   | <i>Triticum aestivum</i> | + | + | R |
| UC1358         | <i>Triticum aestivum</i> | - | - | S |
| UC1358+Yr15*   | <i>Triticum aestivum</i> | + | + | R |
| UC1419         | <i>Triticum aestivum</i> | - | - | S |
| UC1419+Yr15*   | <i>Triticum aestivum</i> | + | + | R |
| UCKern         | <i>Triticum aestivum</i> | - | - | S |
| UCKern+Yr15*   | <i>Triticum aestivum</i> | + | + | R |
| V763*          | <i>Triticum aestivum</i> | + | + | R |
| Yoval          | <i>Triticum aestivum</i> | - | - | S |
| Zaher          | <i>Triticum aestivum</i> | - | - | S |

\*Yr15 introgression lines from DIC G25<sup>1</sup>.

†*T. durum* accessions from the Salamini collection<sup>9</sup>.

‡Phenotypic response to inoculation with *Pst* isolate #5006 (R, resistant; S, susceptible; NT, not tested).

**Supplementary Table 13. The presence of key conserved residues<sup>4,10</sup> in the putative kinase domains of the predicted proteins for 92 TKP sequences.**

| Name of the predicted protein* | Key conserved residues |                 |                 |                  |                  |                  |                  |                  |
|--------------------------------|------------------------|-----------------|-----------------|------------------|------------------|------------------|------------------|------------------|
|                                | G <sup>52</sup>        | K <sup>72</sup> | E <sup>91</sup> | H <sup>158</sup> | H <sup>164</sup> | D <sup>166</sup> | N <sup>171</sup> | D <sup>184</sup> |
| TraesCS1A01G061500.1 K1        | G                      | K               | E               | H                | H                | D                | N                | D                |
| TraesCS1A01G197000.2 K1        | G                      | K               | E               | H                | H                | D                | N                | D                |
| TraesCS1A01G432400.1 K1        | G                      | K               | E               | H                | H                | D                | N                | D                |
| TraesCS1B01G079900.1 K1        | G                      | K               | E               | H                | H                | D                | N                | D                |
| TraesCS1D01G033500.1 K1        | G                      | K               | E               | H                | H                | D                | N                | D                |
| TraesCS2A01G510300.1 K1        | G                      | K               | E               | H                | H                | D                | N                | D                |
| TraesCS2B01G538000.1 K1        | G                      | K               | E               | H                | H                | D                | N                | D                |
| TraesCS2B01G538200.1 K1        | G                      | K               | E               | H                | H                | D                | N                | D                |
| TraesCS2D01G123700.1 K1        | G                      | K               | E               | H                | C                | E                | D                | L                |
| TraesCS2D01G124300.1 K1        | G                      | K               | E               | H                | C                | E                | D                | L                |
| TraesCS2D01G511500.1 K1        | G                      | K               | E               | H                | H                | D                | N                | D                |
| TraesCS2D01G579800.3 K1        | G                      | K               | E               | H                | H                | D                | N                | D                |
| TraesCS3B01G579200.1 K1        | G                      | K               | E               | H                | H                | D                | N                | D                |
| TraesCS4A01G334900.1 K1        | G                      | K               | E               | H                | H                | D                | N                | D                |
| TraesCS4A01G335000.1 K1        | G                      | K               | E               | H                | H                | D                | N                | D                |
| TraesCS5A01G161500.1 K1        | G                      | K               | E               | H                | H                | D                | N                | D                |
| TraesCS5A01G241300.2 K1        | G                      | K               | E               | H                | H                | D                | N                | D                |
| TraesCS5A01G449800.1 K1        | G                      | K               | E               | H                | H                | D                | N                | D                |
| TraesCS5B01G005400.3 K1        | G                      | K               | E               | H                | H                | D                | N                | D                |
| TraesCS5B01G159000.1 K1        | G                      | K               | E               | H                | H                | D                | N                | D                |
| TraesCS5B01G239600.1 K1        | G                      | K               | E               | H                | H                | D                | N                | D                |
| TraesCS5D01G166400.1 K1        | G                      | K               | E               | H                | H                | D                | N                | D                |
| TraesCS5D01G241800.1 K1        | G                      | K               | E               | L                | H                | D                | N                | D                |
| TraesCS5D01G247800.1 K1        | G                      | K               | E               | H                | H                | D                | N                | D                |
| TraesCS5D01G459500.1 K1        | G                      | K               | E               | H                | H                | D                | N                | D                |
| TraesCS5D01G459700.1 K1        | G                      | K               | E               | H                | H                | D                | N                | N                |
| TraesCS5D01G537200.1 K1        | G                      | K               | E               | H                | H                | D                | N                | D                |
| TraesCS6A01G020100.1 K1        | G                      | K               | E               | H                | H                | D                | N                | D                |
| TraesCS6A01G036400.1 K1        | G                      | K               | E               | H                | H                | D                | N                | D                |
| TraesCS6B01G029600.1 K1        | G                      | K               | E               | H                | H                | D                | N                | D                |
| TraesCS6B01G050800.1 K1        | G                      | K               | E               | H                | H                | D                | N                | D                |
| TraesCS6B01G050900.1 K1        | G                      | K               | E               | H                | H                | D                | N                | D                |
| TraesCS6B01G051000.1 K1        | G                      | K               | E               | D                | H                | D                | N                | D                |
| TraesCS6D01G025700.1 K1        | G                      | K               | E               | H                | H                | D                | N                | D                |
| TraesCS6D01G042200.1 K1        | G                      | K               | E               | H                | H                | D                | N                | D                |
| TraesCS6D01G042300.1 K1        | G                      | K               | E               | H                | H                | D                | N                | D                |
| TraesCS7B01G048900.1 K1        | G                      | K               | E               | H                | H                | D                | N                | D                |
| TraesCS7D01G147900.1 K1        | G                      | K               | E               | H                | H                | D                | N                | D                |
| WTK1 K1                        | G                      | K               | E               | H                | H                | D                | N                | D                |
| MLOC K1                        | G                      | K               | E               | H                | H                | D                | N                | D                |
| RPG1 K2                        | G                      | K               | E               | H                | H                | D                | N                | D                |
| HORVU1Hr1G011660.17 K1         | G                      | K               | E               | H                | H                | D                | N                | D                |
| HORVU1Hr1G051220.15 K1         | G                      | K               | E               | H                | H                | D                | N                | D                |
| HORVU5Hr1G050470.1 K1          | G                      | K               | E               | H                | H                | D                | N                | D                |
| HORVU5Hr1G107460.3 K1          | G                      | K               | E               | H                | H                | D                | N                | D                |
| HORVU6Hr1G003940.7 K1          | G                      | K               | E               | H                | H                | D                | N                | D                |
| HORVU6Hr1G025940.2 K1          | G                      | K               | E               | H                | H                | D                | N                | D                |
| HORVU7Hr1G001450.11 K2         | G                      | K               | E               | H                | H                | D                | N                | D                |

|                         |   |   |   |   |   |   |   |   |
|-------------------------|---|---|---|---|---|---|---|---|
| HORVU7Hr1G001600.12_K2  | G | K | E | H | H | D | N | D |
| Sc1Loc00250465.1_K1     | G | K | E | H | H | D | N | D |
| Sc5Loc01920045.3_K1     | G | K | E | Y | H | D | N | D |
| Sc2Loc00020948.6_K1     | G | K | E | H | H | D | N | D |
| Os01t0310500-01_K1      | G | K | E | H | H | D | N | D |
| Os07t0493200-01_K1      | G | K | E | H | H | D | N | D |
| Os07t0493800-00_K1      | G | K | E | H | H | D | N | D |
| Os07t0494300-00_K1      | G | K | E | H | H | D | N | D |
| Os10t0141200-00_K1      | G | K | E | H | H | D | N | D |
| Os10t0143866-00_K1      | G | K | E | H | H | D | N | D |
| Os11t0173432-00_K1      | G | K | E | H | H | D | N | D |
| Os11t0445300-01_K1      | G | K | E | H | H | D | N | D |
| Os11t0553500-00_K1      | G | K | E | H | H | D | N | D |
| Os11t0556400-00_K1      | G | K | E | H | H | D | N | D |
| AQK57443.1_K2           | G | K | E | H | H | D | N | D |
| AQK57450.1_K2           | G | K | E | H | H | D | N | D |
| AQK57451.1_K1           | G | K | E | H | H | D | N | D |
| AQK57454.1_K2           | G | K | E | H | H | D | N | D |
| AQK58522.1_K1           | G | K | E | H | H | N | N | D |
| AQK90211.1_K1           | G | K | E | H | H | D | N | D |
| AQK92446.1_K1           | G | K | E | H | H | D | N | D |
| ONM26931.1_K1           | G | K | E | H | H | D | N | D |
| AT2G32800.1_K1          | G | K | E | H | H | D | N | D |
| Pp1s31_26V6.1_K2        | G | K | E | H | H | D | N | D |
| PGSC0003DMP400002294_K2 | G | K | E | H | H | D | N | D |
| BnaA07g14690D_K1        | G | K | E | H | H | D | N | D |
| BnaA09g41440D_K1        | G | K | E | H | H | D | N | D |
| BnaC04g38500D_K1        | G | Y | E | H | Y | D | N | D |
| BnaA03g15120D_K1        | G | K | E | H | H | D | N | D |
| BnaA02g06510D_K1        | G | K | E | H | H | D | N | D |
| Potri.017G055000_K1     | G | K | E | H | H | D | N | D |
| Potri.001G315000_K1     | G | K | E | H | H | D | N | D |
| SOBIC.010G171600.1.P_K1 | G | K | E | H | H | D | N | D |
| SOBIC.005G096400.1.P_K1 | G | K | E | H | H | N | N | D |
| SOBIC.008G022300.2.P_K1 | G | K | E | H | H | D | N | D |
| SOBIC.001G353800.1.P_K1 | G | K | E | H | H | D | N | D |
| SOBIC.008G148200.2.P_K1 | G | K | E | H | H | D | N | D |
| SOBIC.010G028950.1.P_K1 | G | K | E | H | H | D | N | D |
| SOBIC.005G154100.1.P_K1 | G | K | E | H | H | D | N | D |
| SOBIC.009G246800.1.P_K1 | G | K | E | H | H | D | N | D |
| SOBIC.005G155100.1.P_K1 | G | K | E | H | H | D | N | D |
| SOBIC.005G154800.1.P_K1 | G | K | E | H | H | D | N | D |
| SOBIC.005G060700.2.P_K1 | G | K | E | H | H | D | N | D |
| SOBIC.001G354100.2.P_K1 | G | K | E | H | H | D | N | G |

\*The predicted proteins are named according to the gene models in the respective genome assemblies. Suffix K1/2 marks the position of the putative kinase domain within the tandem kinase-pseudokinase structure relative to the 5'-end.



**Supplementary Table 14. The presence of key conserved residues<sup>4,10</sup> in the putative pseudokinase domains of the predicted proteins for 92 TKP sequences.**

| Name of the predicted protein* | Key conserved residues |                 |                 |                  |                  |                  |                  |                  |
|--------------------------------|------------------------|-----------------|-----------------|------------------|------------------|------------------|------------------|------------------|
|                                | G <sup>52</sup>        | K <sup>72</sup> | E <sup>91</sup> | H <sup>158</sup> | H <sup>164</sup> | D <sup>166</sup> | N <sup>171</sup> | D <sup>184</sup> |
| TraesCS1A01G061500.1 K2        | S                      | N               | K               | H                | H                | N                | K                | D                |
| TraesCS1A01G197000.2 K2        | G                      | K               | I               | H                | H                | D                | N                | N                |
| TraesCS1A01G432400.1 K2        | G                      | R               | E               | N                | C                | N                | N                | D                |
| TraesCS1B01G079900.1 K2        | S                      | K               | K               | H                | H                | N                | K                | D                |
| TraesCS1D01G033500.1 K2        | G                      | S               | S               | H                | H                | N                | T                | D                |
| TraesCS2A01G510300.1 K2        | G                      | K               | L               | H                | H                | N                | N                | E                |
| TraesCS2B01G538000.1 K2        | G                      | K               | H               | H                | H                | N                | N                | E                |
| TraesCS2B01G538200.1 K2        | G                      | K               | H               | H                | H                | N                | N                | E                |
| TraesCS2D01G123700.1 K2        | G                      | Q               | M               | H                | S                | K                | N                | D                |
| TraesCS2D01G124300.1 K2        | G                      | K               | D               | H                | S                | K                | N                | D                |
| TraesCS2D01G511500.1 K2        | -                      | K               | H               | H                | H                | N                | N                | E                |
| TraesCS2D01G579800.3 K2        | G                      | K               | E               | H                | H                | D                | N                | G                |
| TraesCS3B01G579200.1 K2        | G                      | K               | G               | H                | H                | S                | N                | G                |
| TraesCS4A01G334900.1 K2        | S                      | K               | E               | H                | H                | D                | S                | G                |
| TraesCS4A01G335000.1 K2        | G                      | R               | E               | H                | H                | R                | S                | D                |
| TraesCS5A01G161500.1 K2        | L                      | K               | E               | H                | H                | N                | A                | S                |
| TraesCS5A01G241300.2 K2        | G                      | K               | E               | H                | F                | D                | H                | G                |
| TraesCS5A01G449800.1 K2        | G                      | K               | E               | H                | P                | D                | N                | E                |
| TraesCS5B01G005400.3 K2        | G                      | K               | E               | H                | H                | N                | N                | D                |
| TraesCS5B01G159000.1 K2        | L                      | K               | E               | H                | H                | N                | A                | S                |
| TraesCS5B01G239600.1 K2        | G                      | K               | E               | H                | V                | D                | N                | G                |
| TraesCS5D01G166400.1 K2        | L                      | K               | E               | H                | H                | N                | A                | S                |
| TraesCS5D01G241800.1 K2        | G                      | K               | R               | H                | H                | N                | N                | E                |
| TraesCS5D01G247800.1 K2        | G                      | K               | E               | H                | V                | D                | N                | D                |
| TraesCS5D01G459500.1 K2        | S                      | K               | E               | H                | P                | V                | N                | S                |
| TraesCS5D01G459700.1 K2        | A                      | K               | K               | H                | P                | V                | N                | A                |
| TraesCS5D01G537200.1 K2        | G                      | K               | Q               | H                | H                | D                | N                | D                |
| TraesCS6A01G020100.1 K2        | L                      | K               | E               | H                | H                | C                | N                | Y                |
| TraesCS6A01G036400.1 K2        | D                      | K               | E               | K                | H                | N                | N                | N                |
| TraesCS6B01G029600.1 K2        | G                      | K               | E               | H                | H                | G                | N                | W                |
| TraesCS6B01G050800.1 K2        | D                      | R               | E               | H                | H                | D                | N                | G                |
| TraesCS6B01G050900.1 K2        | D                      | R               | E               | H                | H                | N                | N                | D                |
| TraesCS6B01G051000.1 K2        | G                      | R               | E               | H                | H                | D                | N                | D                |
| TraesCS6D01G025700.1 K2        | G                      | K               | E               | H                | H                | G                | N                | W                |
| TraesCS6D01G042200.1 K2        | G                      | R               | E               | H                | H                | N                | N                | D                |
| TraesCS6D01G042300.1 K2        | D                      | R               | E               | H                | H                | D                | N                | D                |
| TraesCS7B01G048900.1 K2        | C                      | N               | S               | H                | G                | N                | N                | -                |
| TraesCS7D01G147900.1 K2        | C                      | N               | S               | H                | G                | N                | N                | G                |
| WTK1 K2                        | S                      | K               | K               | H                | H                | N                | K                | G                |
| MLOC K2                        | G                      | K               | E               | H                | H                | D                | N                | D                |
| RPG1 K1                        | G                      | K               | E               | H                | H                | E                | K                | G                |
| HORVU1Hr1G011660.17 K2         | D                      | K               | E               | H                | H                | N                | N                | G                |
| HORVU1Hr1G051220.15 K2         | G                      | K               | I               | H                | H                | D                | N                | N                |
| HORVU5Hr1G050470.1 K2          | L                      | K               | E               | H                | H                | N                | A                | S                |
| HORVU5Hr1G107460.3 K2          | G                      | K               | E               | H                | P                | D                | N                | K                |
| HORVU6Hr1G003940.7 K2          | D                      | K               | E               | H                | H                | G                | S                | Y                |
| HORVU6Hr1G025940.2 K2          | G                      | K               | E               | H                | H                | N                | N                | D                |
| HORVU7Hr1G001450.11 K1         | G                      | K               | E               | H                | H                | E                | K                | G                |

|                         |   |   |   |   |   |   |   |   |
|-------------------------|---|---|---|---|---|---|---|---|
| HORVU7Hr1G001600.12_K1  | - | - | E | H | H | G | K | G |
| Sc1Loc00250465.1_K2     | D | K | E | H | H | N | N | G |
| Sc5Loc01920045.3_K2     | G | K | Q | H | H | G | N | - |
| Sc2Loc00020948.6_K2     | G | K | H | H | H | N | N | E |
| Os01t0310500-01_K2      | E | K | T | H | H | N | N | N |
| Os07t0493200-01_K2      | C | K | E | H | H | N | N | G |
| Os07t0493800-00_K2      | R | K | E | H | H | D | N | G |
| Os07t0494300-00_K2      | C | K | E | H | H | D | D | G |
| Os10t0141200-00_K2      | S | K | Q | H | - | S | D | K |
| Os10t0143866-00_K2      | D | K | E | H | H | N | T | G |
| Os11t0173432-00_K2      | G | K | E | H | H | D | N | D |
| Os11t0445300-01_K2      | L | K | E | H | H | N | A | S |
| Os11t0553500-00_K2      | D | K | E | H | H | P | D | C |
| Os11t0556400-00_K2      | G | K | A | H | H | D | N | A |
| AQK57443.1_K1           | - | - | - | H | H | N | N | D |
| AQK57450.1_K1           | G | K | E | H | H | N | N | D |
| AQK57451.1_K2           | G | R | E | H | - | M | - | - |
| AQK57454.1_K1           | - | - | - | H | H | N | N | D |
| AQK58522.1_K2           | G | K | E | - | - | - | - | - |
| AQK90211.1_K2           | A | N | D | C | C | T | T | D |
| AQK92446.1_K2           | L | K | E | H | H | S | A | S |
| ONM26931.1_K2           | G | H | G | H | H | S | T | E |
| AT2G32800.1_K2          | V | K | E | H | H | N | T | G |
| Pp1s31_26V6.1_K1        | D | K | E | H | H | D | N | D |
| PGSC0003DMP400002294_K1 | G | K | E | H | H | D | K | D |
| BnaA07g14690D_K2        | G | K | E | H | H | D | N | D |
| BnaA09g41440D_K2        | G | K | E | H | H | D | N | D |
| BnaC04g38500D_K2        | G | K | K | H | Y | D | N | C |
| BnaA03g15120D_K2        | V | K | E | H | H | N | T | G |
| BnaA02g06510D_K2        | G | A | E | H | H | D | N | D |
| Potri.017G055000_K2     | V | K | E | H | H | N | S | N |
| Potri.001G315000_K2     | V | K | E | H | H | N | S | N |
| SOBIC.010G171600.1.P_K2 | G | K | E | H | H | D | N | D |
| SOBIC.005G096400.1.P_K2 | G | K | E | H | H | D | N | D |
| SOBIC.008G022300.2.P_K2 | D | R | E | C | H | N | C | I |
| SOBIC.001G353800.1.P_K2 | G | I | E | H | Y | N | D | D |
| SOBIC.008G148200.2.P_K2 | D | K | D | H | H | N | N | E |
| SOBIC.010G028950.1.P_K2 | G | V | T | Q | H | N | - | A |
| SOBIC.005G154100.1.P_K2 | G | H | E | H | H | S | T | E |
| SOBIC.009G246800.1.P_K2 | L | K | D | H | H | N | A | S |
| SOBIC.005G155100.1.P_K2 | G | R | E | H | H | Y | K | G |
| SOBIC.005G154800.1.P_K2 | G | R | E | H | H | S | T | E |
| SOBIC.005G060700.2.P_K2 | G | K | E | H | H | N | N | D |
| SOBIC.001G354100.2.P_K2 | G | A | E | H | H | N | N | D |

\*The predicted proteins are named according to the gene models in the respective genome assemblies. Suffix K1/2 marks the position of the putative pseudokinase domain within the tandem kinase-pseudokinase structure relative to the 5'-end.

### Supplementary References:

1. Yaniv, E. *et al.* Evaluation of marker-assisted selection for the stripe rust resistance gene *Yr15*, introgressed from wild emmer wheat. *Mol. Breeding* **35**, 43 (2015).
2. Raats, D. *et al.* The physical map of wheat chromosome 1BS provides insights into its gene space organization and evolution. *Genome Biol.* **14**, R138 (2013).
3. Zuckerkandl, E. & Pauling, L. “Evolutionary divergence and convergence in proteins” in *Evolving Genes and Proteins*, V. Bryson, H. J. Vogel, Eds. (Academic Press, New York, 1965), pp. 97–166.
4. Hanks, S. K., Quinn, A. M. & Hunter, T. The protein kinase family: conserved features and deduced phylogeny of the catalytic domains. *Science* **241**, 42–52 (1988).
5. Zulawski, M. *et al.* The *Arabidopsis* Kinome: phylogeny and evolutionary insights into functional diversification. *BMC Genomics* **15**, 548 (2014).
6. Raats, D. *et al.* “Application of CAPS markers for genomic studies in wild emmer wheat” in *Cleaved Amplified Polymorphic Sequences (CAPS) Markers in Plant Biology*, Y. Savrukov, Ed. (Nova Science Publishers, New York, 2014), pp. 31–61.
7. Paux, E. *et al.* *Plant biotechnology journal* **8**, 196–210 (2010).
8. Nevo, E., Korol, A.B., Beiles, A. & Fahima, T. *Evolution of Wild Emmer and Wheat Improvement: Population Genetics, Genetic Resources, and Genome Organization of Wheats Progenitor, Triticum dicoccoides*. (Springer, Berlin, 2002).
9. Özkan, H. *et al.* A reconsideration of the domestication geography of tetraploid wheats. *Theor. Appl. Genet.* **110**, 1052–1060 (2005).
10. Kannan, N., Taylor, S. S., Zhai, Y., Venter, J. C. & Manning, G. Structural and functional diversity of the microbial kinome. *PLoS Biology* **5**, 467–478 (2007).
